# Supplementary material for: Post-COVID Phenotypic Manifestations are Associated with New-Onset Psychiatric Disease: Findings from the NIH N3C and RECOVER Studies
Source: bioRxiv or medRxiv preprint supplement (doi:10.1101/2022.07.08.22277388), 2022-11-01
Supplement: Supplementary file [file media-1.pdf]

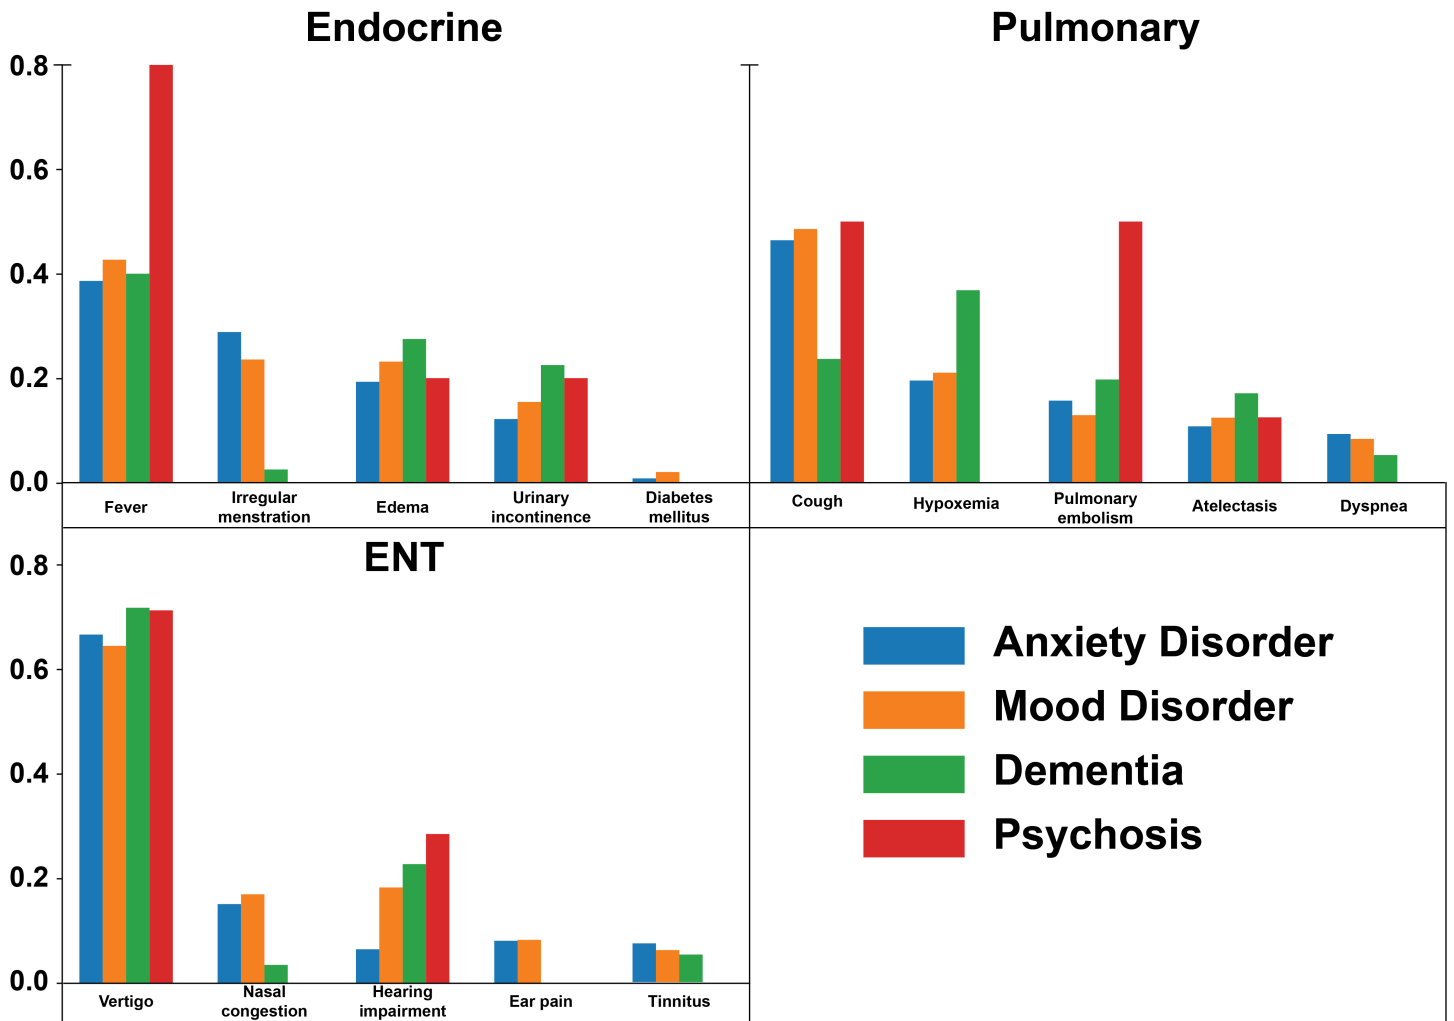

**Figure S1. Proportion of Patients with HPO Feature by Category and Outcome.** The X-axis shows the five most prevalent HPO features from the displayed category. The Y-axis shows the proportion of patients with that feature from the set patients with the indicated symptom category and outcome.

**Table S1. HPO Category: neuropsychiatric.** Given the removal of psychiatric HPO terms we refer to this category as **neurologic**. ✓: observed; ×: excluded because of overlapped with mental health outcomes; ∅: not observed in the EHR dataset and therefore not used in the analysis.

| <b>Id</b>  | <b>label</b>                             | <b>status</b> |
|------------|------------------------------------------|---------------|
| HP:0030784 | Anomic aphasia                           | ✓             |
| HP:0002381 | Aphasia                                  | ✓             |
| HP:0033849 | Bilingual aphasia                        | ∅             |
| HP:0002427 | Expressive aphasia                       | ✓             |
| HP:0033848 | Receptive aphasia                        | ∅             |
| HP:0001350 | Slurred speech                           | ✓             |
| HP:0010524 | Agnosia                                  | ✓             |
| HP:0002067 | Bradykinesia                             | ✓             |
| HP:0031843 | Bradyphrenia                             | ✓             |
| HP:0100543 | Cognitive impairment                     | ∅             |
| HP:0001289 | Confusion                                | ✓             |
| HP:0031987 | Diminished ability to concentrate        | ✓             |
| HP:0001298 | Encephalopathy                           | ✓             |
| HP:0033844 | Tachyphrenia                             | ∅             |
| HP:0002315 | Headache                                 | ✓             |
| HP:0002076 | Migraine                                 | ✓             |
| HP:0041051 | Ageusia                                  | ✓             |
| HP:0000458 | Anosmia                                  | ✓             |
| HP:0000224 | Hypogeusia                               | ✓             |
| HP:0004409 | Hyposmia                                 | ✓             |
| HP:0031249 | Parageusia                               | ✓             |
| HP:0033847 | Phantageusia                             | ∅             |
| HP:0033693 | Phantosmia                               | ∅             |
| HP:0000718 | Aggressive behavior                      | ✓             |
| HP:0000716 | Depression                               | ×             |
| HP:0033838 | Dysphoria                                | ∅             |
| HP:0000712 | Emotional lability                       | ∅             |
| HP:0031844 | Euphoria                                 | ✓             |
| HP:0100754 | Mania                                    | ✓             |
| HP:0033845 | Sense of impending doom                  | ∅             |
| HP:0031589 | Suicidal ideation                        | ∅             |
| HP:0033705 | Tearfulness                              | ∅             |
| HP:0033689 | Anterograde memory impairment            | ∅             |
| HP:0033688 | Long term memory impairment              | ∅             |
| HP:0002354 | Memory impairment                        | ✓             |
| HP:0033691 | Procedural memory loss                   | ∅             |
| HP:0033687 | Short term memory impairment             | ∅             |
| HP:0000739 | Anxiety                                  | ×             |
| HP:0000741 | Apathy                                   | ✓             |
| HP:0007018 | Attention deficit hyperactivity disorder | ×             |
| HP:0008765 | Auditory hallucinations                  | ✓             |
| HP:0033630 | Brain fog                                | ∅             |
| HP:0000746 | Delusions                                | ✓             |
| HP:0000738 | Hallucinations                           | ✓             |

Continued on next page

**Table S1 – continued from previous page**

| <b>Id</b>  | <b>label</b>                     | <b>status</b> |
|------------|----------------------------------|---------------|
| HP:0033051 | Impaired executive functioning   | ✓             |
| HP:0100710 | Impulsivity                      | ∅             |
| HP:0000737 | Irritability                     | ✓             |
| HP:0025269 | Panic attack                     | ×             |
| HP:0002183 | Phonophobia                      | ×             |
| HP:0001959 | Polydipsia                       | ∅             |
| HP:0033676 | Posttraumatic stress symptom     | ∅             |
| HP:0000736 | Short attention span             | ✓             |
| HP:0033694 | Tactile hallucination            | ∅             |
| HP:0002367 | Visual hallucinations            | ✓             |
| HP:0033747 | Abnormal exteroceptive sensation | ∅             |
| HP:0031826 | Abnormal reflex                  | ✓             |
| HP:0100022 | Abnormality of movement          | ✓             |
| HP:0001251 | Ataxia                           | ✓             |
| HP:0003487 | Babinski sign                    | ✓             |
| HP:0001260 | Dysarthria                       | ✓             |
| HP:0001310 | Dysmetria                        | ✓             |
| HP:0002015 | Dysphagia                        | ✓             |
| HP:0001332 | Dystonia                         | ✓             |
| HP:0007209 | Facial paralysis                 | ∅             |
| HP:0000743 | Frontal release signs            | ∅             |
| HP:0001288 | Gait disturbance                 | ∅             |
| HP:0030237 | Hand muscle weakness             | ✓             |
| HP:0100963 | Hyperesthesia                    | ✓             |
| HP:0002487 | Hyperkinetic movements           | ✓             |
| HP:0033748 | Hypoesthesia                     | ∅             |
| HP:0001252 | Hypotonia                        | ∅             |
| HP:0003394 | Muscle spasm                     | ✓             |
| HP:0001324 | Muscle weakness                  | ✓             |
| HP:0001278 | Orthostatic hypotension          | ✓             |
| HP:0003401 | Paresthesia                      | ✓             |
| HP:0001300 | Parkinsonism                     | ✓             |
| HP:0001271 | Polyneuropathy                   | ✓             |
| HP:0002063 | Rigidity                         | ∅             |
| HP:0001250 | Seizure                          | ✓             |
| HP:0003202 | Skeletal muscle atrophy          | ✓             |
| HP:0003474 | Somatic sensory dysfunction      | ✓             |
| HP:0001257 | Spasticity                       | ✓             |
| HP:0001337 | Tremor                           | ✓             |
| HP:0012799 | Unilateral facial palsy          | ∅             |
| HP:0100785 | Insomnia                         | ✓             |
| HP:0031355 | Maintenance insomnia             | ∅             |
| HP:0012452 | Restless legs                    | ✓             |
| HP:0010535 | Sleep apnea                      | ✓             |
| HP:0002360 | Sleep disturbance                | ✓             |
| HP:0031354 | Sleep onset insomnia             | ∅             |
| HP:0031356 | Terminal insomnia                | ✓             |

**Table S2. HPO Category: Ear, Nose, and Throat (ENT).** ✓: observed; ×: excluded because of overlapped with mental health outcomes; ∅: not observed in the EHR dataset and therefore not used in the analysis.

| <b>Id</b>  | <b>label</b>       | <b>status</b> |
|------------|--------------------|---------------|
| HP:0001618 | Dysphonia          | ∅             |
| HP:0001742 | Nasal congestion   | ✓             |
| HP:0033050 | Pharyngalgia       | ✓             |
| HP:0012384 | Rhinitis           | ✓             |
| HP:0030766 | Ear pain           | ✓             |
| HP:0000365 | Hearing impairment | ✓             |
| HP:0010780 | Hyperacusis        | ✓             |
| HP:0008629 | Pulsatile tinnitus | ✓             |
| HP:0000360 | Tinnitus           | ✓             |
| HP:0002321 | Vertigo            | ✓             |

**Table S3. HPO Category: skin.** ✓: observed; ×: excluded because of overlapped with mental health outcomes; ∅: not observed in the EHR dataset and therefore not used in the analysis.

| <b>Id</b>  | <b>label</b>             | <b>status</b> |
|------------|--------------------------|---------------|
| HP:0001596 | Alopecia                 | ✓             |
| HP:0011971 | Dermatographic urticaria | ✓             |
| HP:0031284 | Flushing                 | ∅             |
| HP:0001808 | Fragile nails            | ∅             |
| HP:0000975 | Hyperhidrosis            | ✓             |
| HP:0000967 | Petechiae                | ✓             |
| HP:0000989 | Pruritus                 | ✓             |
| HP:0033696 | Pseudo-chilblain         | ∅             |
| HP:0040189 | Scaling skin             | ✓             |
| HP:0000988 | Skin rash                | ✓             |

**Table S4. HPO Category: pulmonary.** ✓: observed; ×: excluded because of overlapped with mental health outcomes; ∅: not observed in the EHR dataset and therefore not used in the analysis.

| Id         | label                                                      | status |
|------------|------------------------------------------------------------|--------|
| HP:0031983 | Abnormal pulmonary thoracic imaging finding                | ∅      |
| HP:0100750 | Atelectasis                                                | ✓      |
| HP:0002110 | Bronchiectasis                                             | ✓      |
| HP:0025180 | Centrilobular ground-glass opacification on pulmonary HRCT | ∅      |
| HP:0033659 | Crazy-paving pattern                                       | ∅      |
| HP:0030879 | Interlobular septal thickening                             | ∅      |
| HP:0032177 | Parenchymal consolidation                                  | ∅      |
| HP:0031944 | Pleural thickening                                         | ✓      |
| HP:0032446 | Pulmonary bulla                                            | ∅      |
| HP:0002206 | Pulmonary fibrosis                                         | ✓      |
| HP:0033711 | Pulmonary interstitial thickening                          | ∅      |
| HP:0025390 | Reticular pattern on pulmonary HRCT                        | ∅      |
| HP:0033609 | Solid pulmonary nodule                                     | ∅      |
| HP:0033610 | Subsolid pulmonary nodule                                  | ∅      |
| HP:0033702 | Subpleural curvilinear line                                | ∅      |
| HP:0006536 | Airway obstruction                                         | ∅      |
| HP:0045051 | Decreased DLCO                                             | ∅      |
| HP:0033760 | Decreased maximal oxygen uptake                            | ∅      |
| HP:0033773 | Decreased RV/TLC ratio                                     | ∅      |
| HP:0025179 | Ground-glass opacification                                 | ∅      |
| HP:0012418 | Hypoxemia                                                  | ✓      |
| HP:0030874 | Oxygen desaturation on exertion                            | ∅      |
| HP:0030877 | Reduced FEV1/FVC ratio                                     | ∅      |
| HP:0032342 | Reduced forced expiratory volume in one second             | ∅      |
| HP:0032341 | Reduced forced vital capacity                              | ∅      |
| HP:0033750 | Reduced functional residual capacity                       | ∅      |
| HP:0033753 | Reduced residual volume                                    | ∅      |
| HP:0033169 | Reduced total lung capacity                                | ∅      |
| HP:0002091 | Restrictive ventilatory defect                             | ✓      |
| HP:0002102 | Pleuritis                                                  | ✓      |
| HP:0002204 | Pulmonary embolism                                         | ✓      |
| HP:0012735 | Cough                                                      | ✓      |
| HP:0002094 | Dyspnea                                                    | ✓      |
| HP:0002875 | Exertional dyspnea                                         | ✓      |
| HP:0002105 | Hemoptysis                                                 | ✓      |
| HP:0033709 | Increased sputum production                                | ∅      |
| HP:0031246 | Nonproductive cough                                        | ✓      |
| HP:0033771 | Pleuritic chest pain                                       | ∅      |
| HP:0031245 | Productive cough                                           | ✓      |
| HP:0033710 | Rest dyspnea                                               | ∅      |
| HP:0031417 | Rhinorrhea                                                 | ✓      |
| HP:0030831 | Rhonchi                                                    | ✓      |
| HP:0025095 | Sneeze                                                     | ✓      |
| HP:0002789 | Tachypnea                                                  | ∅      |
| HP:0030828 | Wheezing                                                   | ✓      |

**Table S5. HPO Category: endocrine.** ✓: observed; ×: excluded because of overlapped with mental health outcomes; ∅: not observed in the EHR dataset and therefore not used in the analysis.

| <b>Id</b>  | <b>label</b>                         | <b>status</b> |
|------------|--------------------------------------|---------------|
| HP:0012213 | Decreased glomerular filtration rate | ∅             |
| HP:0000819 | Diabetes mellitus                    | ✓             |
| HP:0000969 | Edema                                | ✓             |
| HP:0030014 | Female sexual dysfunction            | ∅             |
| HP:0001945 | Fever                                | ✓             |
| HP:0002046 | Heat intolerance                     | ✓             |
| HP:0002045 | Hypothermia                          | ✓             |
| HP:0000858 | Irregular menstruation               | ✓             |
| HP:0011134 | Low-grade fever                      | ✓             |
| HP:0040307 | Male sexual dysfunction              | ✓             |
| HP:0000132 | Menorrhagia                          | ✓             |
| HP:0001733 | Pancreatitis                         | ✓             |
| HP:0033840 | Postmenopausal bleeding              | ∅             |
| HP:0001954 | Recurrent fever                      | ✓             |
| HP:0000083 | Renal insufficiency                  | ✓             |
| HP:0005968 | Temperature instability              | ∅             |
| HP:0033839 | Testicular pain                      | ∅             |
| HP:0000020 | Urinary incontinence                 | ✓             |

**Table S6. HPO Category: immunology.** ✓: observed; ×: excluded because of overlapped with mental health outcomes; ∅: not observed in the EHR dataset and therefore not used in the analysis.

| <b>Id</b>  | <b>label</b>                                | <b>status</b> |
|------------|---------------------------------------------|---------------|
| HP:0100845 | Anaphylactic shock                          | ✓             |
| HP:0003493 | Antinuclear antibody positivity             | ✓             |
| HP:0025379 | Anti-thyroid peroxidase antibody positivity | ∅             |
| HP:0032069 | Anti-thyroglobulin antibody positivity      | ∅             |
| HP:0002716 | Lymphadenopathy                             | ✓             |
| HP:0001888 | Lymphopenia                                 | ✓             |



**Table S7. HPO Category: constitutional.** ✓: observed; ×: excluded because of overlapped with mental health outcomes; ∅: not observed in the EHR dataset and therefore not used in the analysis.

| <b>Id</b>  | <b>label</b>                              | <b>status</b> |
|------------|-------------------------------------------|---------------|
| HP:0001369 | Arthritis                                 | ✓             |
| HP:0025406 | Asthenia                                  | ✓             |
| HP:0031352 | Chest tightness                           | ✓             |
| HP:0025143 | Chills                                    | ∅             |
| HP:0033850 | Coldness                                  | ∅             |
| HP:0002355 | Difficulty walking                        | ✓             |
| HP:0033665 | Diminished health-related quality of life | ∅             |
| HP:0033667 | Diminished mental health                  | ∅             |
| HP:0033666 | Diminished physical functioning           | ∅             |
| HP:0003546 | Exercise intolerance                      | ✓             |
| HP:0012378 | Fatigue                                   | ✓             |
| HP:0033675 | Frailty                                   | ∅             |
| HP:0031059 | Impaired ability to bathe oneself         | ∅             |
| HP:0031060 | Impaired ability to dress oneself         | ∅             |
| HP:0031058 | Impairment of activities of daily living  | ∅             |
| HP:0033834 | Malaise                                   | ∅             |
| HP:0030166 | Night sweats                              | ✓             |
| HP:0033695 | Occupational disability                   | ∅             |
| HP:0030973 | Postexertional malaise                    | ✓             |
| HP:0025144 | Shivering                                 | ✓             |
| HP:0025258 | Stiff neck                                | ∅             |
| HP:0001824 | Weight loss                               | ∅             |
| HP:0000217 | Xerostomia                                | ✓             |
| HP:0002829 | Arthralgia                                | ✓             |
| HP:0033047 | Body ache                                 | ∅             |
| HP:0002653 | Bone pain                                 | ✓             |
| HP:0100749 | Chest pain                                | ✓             |
| HP:0033746 | Intrascapular pain                        | ∅             |
| HP:0009763 | Limb pain                                 | ✓             |
| HP:0003326 | Myalgia                                   | ✓             |
| HP:0033345 | Neuralgia                                 | ∅             |
| HP:0012531 | Pain                                      | ✓             |

**Table S8. HPO Category: cardiovascular.** ✓: observed; ×: excluded because of overlapped with mental health outcomes; ∅: not observed in the EHR dataset and therefore not used in the analysis.

| <b>Id</b>  | <b>label</b>                                    | <b>status</b> |
|------------|-------------------------------------------------|---------------|
| HP:0001662 | Bradycardia                                     | ✓             |
| HP:4000006 | Elevated myocardial native T1                   | ∅             |
| HP:4000003 | Elevated myocardial native T2                   | ∅             |
| HP:0000822 | Hypertension                                    | ✓             |
| HP:0002615 | Hypotension                                     | ✓             |
| HP:0410174 | Increased circulating troponin T concentration  | ∅             |
| HP:0410173 | Increased circulating troponin I concentration  | ∅             |
| HP:0031862 | Increased heart rate variability                | ∅             |
| HP:0033755 | Increased left ventricular end-diastolic volume | ∅             |
| HP:4000004 | Myocardial late gadolinium enhancement          | ∅             |
| HP:0012819 | Myocarditis                                     | ✓             |
| HP:0001698 | Pericardial effusion                            | ✓             |
| HP:4000005 | Pericardial late gadolinium enhancement         | ∅             |
| HP:0012664 | Reduced ejection fraction                       | ∅             |
| HP:0001649 | Tachycardia                                     | ✓             |
| HP:0004936 | Venous thrombosis                               | ✓             |
| HP:0001681 | Angina pectoris                                 | ✓             |
| HP:0001962 | Palpitations                                    | ✓             |
| HP:0001297 | Stroke                                          | ✓             |
| HP:0001279 | Syncope                                         | ✓             |

**Table S9. HPO Category: gastrointestinal.** ✓: observed; ×: excluded because of overlapped with mental health outcomes; ∅: not observed in the EHR dataset and therefore not used in the analysis.

| <b>Id</b>  | <b>label</b>            | <b>status</b> |
|------------|-------------------------|---------------|
| HP:0002020 | Gastroesophageal reflux | ✓             |
| HP:0002578 | Gastroparesis           | ✓             |
| HP:0002592 | Gastric ulcer           | ✓             |
| HP:0001397 | Hepatic steatosis       | ✓             |
| HP:0002240 | Hepatomegaly            | ✓             |
| HP:0012115 | Hepatitis               | ✓             |
| HP:0004395 | Malnutrition            | ✓             |
| HP:0033757 | Pancreatic steatosis    | ∅             |
| HP:0001744 | Splenomegaly            | ✓             |
| HP:0002027 | Abdominal pain          | ✓             |
| HP:0011458 | Abdominal symptom       | ∅             |
| HP:0002039 | Anorexia                | ∅             |
| HP:0002607 | Bowel incontinence      | ✓             |
| HP:0002019 | Constipation            | ✓             |
| HP:0002014 | Diarrhea                | ✓             |
| HP:0033842 | Early satiety           | ∅             |
| HP:0002018 | Nausea                  | ✓             |
| HP:0002013 | Vomiting                | ✓             |
| HP:0004396 | Poor appetite           | ∅             |

**Table S10. HPO Category: laboratory.** ✓: observed; ×: excluded because of overlapped with mental health outcomes; ∅: not observed in the EHR dataset and therefore not used in the analysis.

| <b>Id</b>  | <b>label</b>                                                   | <b>status</b> |
|------------|----------------------------------------------------------------|---------------|
| HP:0012053 | Decreased circulating calcifediol concentration                | ∅             |
| HP:0003155 | Elevated circulating alkaline phosphatase concentration        | ✓             |
| HP:0031964 | Elevated circulating alanine aminotransferase concentration    | ∅             |
| HP:0031956 | Elevated circulating aspartate aminotransferase concentration  | ∅             |
| HP:0003259 | Elevated circulating creatinine concentration                  | ✓             |
| HP:0003236 | Elevated circulating creatine kinase concentration             | ∅             |
| HP:0011227 | Elevated circulating C-reactive protein concentration          | ✓             |
| HP:0033106 | Elevated circulating D-dimer concentration                     | ∅             |
| HP:0033833 | Elevated circulating soluble CD25 concentration                | ∅             |
| HP:0002925 | Elevated circulating thyroid-stimulating hormone concentration | ✓             |
| HP:0003565 | Elevated erythrocyte sedimentation rate                        | ✓             |
| HP:0030948 | Elevated gamma-glutamyltransferase level                       | ∅             |
| HP:0002901 | Hypocalcemia                                                   | ✓             |
| HP:0011900 | Hypofibrinogenemia                                             | ✓             |
| HP:0003074 | Hyperglycemia                                                  | ✓             |
| HP:0001943 | Hypoglycemia                                                   | ✓             |
| HP:0002148 | Hypophosphatemia                                               | ✓             |
| HP:0003281 | Increased circulating ferritin concentration                   | ∅             |
| HP:0030783 | Increased circulating interleukin 6                            | ∅             |
| HP:0025435 | Increased circulating lactate dehydrogenase concentration      | ∅             |
| HP:0031185 | Increased circulating NT-proBNP concentration                  | ∅             |
| HP:0032308 | Increased circulating procalcitonin concentration              | ∅             |
| HP:0001873 | Thrombocytopenia                                               | ✓             |

**Table S11. HPO Category: eye.** ✓: observed; ×: excluded because of overlapped with mental health outcomes; ∅: not observed in the EHR dataset and therefore not used in the analysis.

| <b>Id</b>  | <b>label</b>                 | <b>status</b> |
|------------|------------------------------|---------------|
| HP:0000618 | Blindness                    | ✓             |
| HP:0000622 | Blurred vision               | ✓             |
| HP:0000509 | Conjunctivitis               | ✓             |
| HP:0000651 | Diplopia                     | ✓             |
| HP:0000640 | Gaze-evoked nystagmus        | ✓             |
| HP:0001097 | Keratoconjunctivitis sicca   | ✓             |
| HP:0200026 | Ocular pain                  | ✓             |
| HP:0033841 | Ocular pruritus              | ∅             |
| HP:0007994 | Peripheral visual field loss | ✓             |
| HP:0000613 | Photophobia                  | ✓             |
| HP:0025337 | Red eye                      | ✓             |
| HP:0000572 | Visual loss                  | ✓             |
| HP:0100832 | Vitreous floaters            | ✓             |

**Table S12. Logistic Regression for All Factors and Outcomes.** Odds ratios, 95% confidence intervals, and p-values for the association of features in all factors and outcomes.

| Predictor                                                | All Mental Illness |       | Anxiety Disorder |       | Mood Disorder    |       | Dementia            |       | Psychosis        |       |
|----------------------------------------------------------|--------------------|-------|------------------|-------|------------------|-------|---------------------|-------|------------------|-------|
|                                                          | OR (CI)            | p-val | OR (CI)          | p-val | OR (CI)          | p-val | OR (CI)             | p-val | OR (CI)          | p-val |
| (Intercept)                                              | 0.02 (0.02-0.02)   | <0.05 | 0.01 (0.01-0.01) | <0.05 | 0.01 (0.01-0.01) | <0.05 | 0 (0-0)             | <0.05 | 0 (0-0)          | <0.05 |
| constitutional neurological                              | 1.6 (1.56-1.65)    | <0.05 | 1.69 (1.62-1.76) | <0.05 | 1.51 (1.43-1.59) | <0.05 | 1.31 (1.14-1.5)     | <0.05 | 1.15 (0.84-1.57) | 0.37  |
| gastrointestinal                                         | 2.3 (2.24-2.36)    | <0.05 | 2.16 (2.08-2.23) | <0.05 | 2.19 (2.1-2.29)  | <0.05 | 2.78 (2.56-3.02)    | <0.05 | 3.5 (3.01-4.07)  | <0.05 |
| pulmonary cardiovascular                                 | 1.44 (1.39-1.48)   | <0.05 | 1.44 (1.38-1.5)  | <0.05 | 1.41 (1.33-1.48) | <0.05 | 1.13 (0.96-1.34)    | 0.15  | 0.91 (0.63-1.33) | 0.63  |
| ENT                                                      | 1.12 (1.07-1.17)   | <0.05 | 1.07 (1.01-1.14) | <0.05 | 1.11 (1.03-1.19) | <0.05 | 0.79 (0.65-0.96)    | <0.05 | 0.67 (0.41-1.11) | 0.12  |
| endocrine                                                | 1.77 (1.69-1.85)   | <0.05 | 2.04 (1.92-2.16) | <0.05 | 1.32 (1.21-1.44) | <0.05 | 1.48 (1.22-1.79)    | <0.05 | 1.44 (0.9-2.31)  | 0.13  |
| age under 10                                             | 1.24 (1.16-1.32)   | <0.05 | 1.33 (1.23-1.44) | <0.05 | 1.1 (0.99-1.23)  | 0.085 | 1.11 (0.85-1.45)    | 0.45  | 0.73 (0.37-1.43) | 0.35  |
| age 10 to 19                                             | 1.1 (1.02-1.18)    | <0.05 | 1.03 (0.93-1.14) | 0.57  | 1.34 (1.2-1.51)  | <0.05 | 0.87 (0.64-1.18)    | 0.37  | 1.31 (0.71-2.42) | 0.39  |
| age 20 to 29                                             | 1.08 (1-1.17)      | 0.063 | 0.5 (0.43-0.57)  | <0.05 | 0.31 (0.25-0.39) | <0.05 | 19.68 (13.52-28.63) | <0.05 | 0.62 (0.23-1.63) | 0.33  |
| age 30 to 39                                             | 1.56 (1.48-1.65)   | <0.05 | 1.38 (1.28-1.5)  | <0.05 | 1.61 (1.45-1.79) | <0.05 | 1.79 (1.14-2.8)     | <0.05 | 0.41 (0.19-0.9)  | <0.05 |
| age 40 to 49                                             | 1.54 (1.47-1.61)   | <0.05 | 1.64 (1.54-1.74) | <0.05 | 1.6 (1.48-1.74)  | <0.05 | 0.99 (0.63-1.55)    | 0.96  | 1.28 (0.81-2.03) | 0.3   |
| age 50 to 59                                             | 1.39 (1.33-1.46)   | <0.05 | 1.51 (1.42-1.6)  | <0.05 | 1.32 (1.22-1.43) | <0.05 | 0.5 (0.29-0.86)     | <0.05 | 1.15 (0.73-1.81) | 0.56  |
| age 60 to 69                                             | 1.14 (1.09-1.2)    | <0.05 | 1.22 (1.15-1.3)  | <0.05 | 1.06 (0.98-1.15) | 0.13  | 0.79 (0.5-1.24)     | 0.31  | 0.62 (0.37-1.06) | 0.079 |
| age 70 to 79                                             | 1                  | REF   | 1                | REF   | 1                | REF   | 1                   | REF   | 1                | REF   |
| age over 80                                              | 0.88 (0.84-0.92)   | <0.05 | 0.79 (0.73-0.84) | <0.05 | 0.93 (0.85-1.01) | 0.089 | 2.28 (1.6-3.24)     | <0.05 | 1.39 (0.89-2.2)  | 0.15  |
| BMI under 20                                             | 0.86 (0.81-0.91)   | <0.05 | 0.68 (0.62-0.74) | <0.05 | 0.92 (0.83-1.01) | 0.091 | 7.23 (5.23-10.02)   | <0.05 | 1.34 (0.77-2.32) | 0.3   |
| BMI 20 to 25                                             | 0.93 (0.85-1.01)   | 0.075 | 0.61 (0.53-0.7)  | <0.05 | 0.74 (0.64-0.87) | <0.05 | 21.05 (15.14-29.26) | <0.05 | 2.27 (1.16-4.44) | <0.05 |
| BMI 25 to 30                                             | 0.94 (0.86-1.03)   | 0.16  | 0.93 (0.82-1.05) | 0.22  | 0.72 (0.6-0.87)  | <0.05 | 0.15 (0.08-0.3)     | <0.05 | 0.63 (0.22-1.77) | 0.37  |
| BMI 30 to 35                                             | 1 (0.94-1.06)      | 0.9   | 0.99 (0.91-1.07) | 0.78  | 0.94 (0.86-1.02) | 0.14  | 1.04 (0.8-1.36)     | 0.76  | 0.92 (0.53-1.6)  | 0.77  |
| BMI 35 to 40                                             | 1                  | REF   | 1                | REF   | 1                | REF   | 1                   | REF   | 1                | REF   |
| BMI over 40                                              | 1.03 (0.97-1.09)   | 0.28  | 1.03 (0.95-1.12) | 0.47  | 1.04 (0.96-1.13) | 0.31  | 1.02 (0.79-1.31)    | 0.9   | 1.13 (0.69-1.88) | 0.62  |
| gender MALE                                              | 1.04 (0.96-1.12)   | 0.34  | 1.04 (0.93-1.16) | 0.53  | 1.11 (0.99-1.25) | 0.065 | 0.87 (0.6-1.25)     | 0.45  | 0.93 (0.46-1.9)  | 0.85  |
| gender FEMALE                                            | 1.09 (1.02-1.16)   | <0.05 | 1.06 (0.97-1.16) | 0.18  | 1.21 (1.1-1.33)  | <0.05 | 0.88 (0.61-1.25)    | 0.46  | 1.2 (0.69-2.09)  | 0.53  |
| smoking status                                           | 0.66 (0.65-0.68)   | <0.05 | 0.52 (0.5-0.54)  | <0.05 | 0.47 (0.45-0.5)  | <0.05 | 0.72 (0.63-0.83)    | <0.05 | 0.9 (0.69-1.18)  | 0.46  |
| length of stay 0d                                        | 1                  | REF   | 1                | REF   | 1                | REF   | 1                   | REF   | 1                | REF   |
| length of stay 1d                                        | 1.25 (1.13-1.38)   | <0.05 | 1.11 (0.96-1.28) | 0.14  | 1.23 (1.03-1.45) | <0.05 | 1.15 (0.59-2.22)    | 0.69  | 0.88 (0.35-2.18) | 0.78  |
| length of stay 2d 3d                                     | 1                  | REF   | 1                | REF   | 1                | REF   | 1                   | REF   | 1                | REF   |
| length of stay 4d 7d                                     | 1.32 (1.2-1.44)    | <0.05 | 1.25 (1.1-1.42)  | <0.05 | 1.06 (0.9-1.25)  | 0.5   | 1.5 (1-2.24)        | <0.05 | 1.31 (0.59-2.95) | 0.51  |
| length of stay in gt 7d                                  | 1.19 (1.09-1.31)   | <0.05 | 0.99 (0.86-1.15) | 0.91  | 1.21 (1.03-1.42) | <0.05 | 1.27 (0.9-1.8)      | 0.17  | 2.03 (1.05-3.93) | <0.05 |
| race ethnicity White                                     | 1.16 (1.07-1.26)   | <0.05 | 1.01 (0.89-1.14) | 0.92  | 1.15 (0.99-1.32) | 0.06  | 1.67 (1.29-2.16)    | <0.05 | 1.38 (0.7-2.72)  | 0.35  |
| Non Hispanic                                             | 1.74 (1.61-1.89)   | <0.05 | 1.62 (1.44-1.82) | <0.05 | 1.29 (1.11-1.51) | <0.05 | 1.99 (1.54-2.57)    | <0.05 | 0.37 (0.11-1.27) | 0.12  |
| race ethnicity Other                                     | 1                  | REF   | 1                | REF   | 1                | REF   | 1                   | REF   | 1                | REF   |
| Non Hispanic                                             | 0.66 (0.58-0.74)   | <0.05 | 0.59 (0.49-0.7)  | <0.05 | 0.6 (0.48-0.75)  | <0.05 | 0.81 (0.42-1.57)    | 0.53  | 0.71 (0.17-2.87) | 0.63  |
| race ethnicity Native Hawaiian or Other Pacific Islander | 0.88 (0.59-1.3)    | 0.52  | 0.78 (0.44-1.38) | 0.39  | 0.79 (0.39-1.59) | 0.51  | NA                  | NA    | NA               | NA    |
| Non Hispanic                                             | 1.04 (1-1.08)      | <0.05 | 0.97 (0.92-1.02) | 0.18  | 0.89 (0.83-0.95) | <0.05 | 0.88 (0.69-1.13)    | 0.32  | 1.39 (0.93-2.09) | 0.11  |
| race ethnicity Any Race                                  | 1.07 (1-1.15)      | 0.065 | 1.03 (0.93-1.13) | 0.61  | 0.85 (0.75-0.98) | <0.05 | 1.24 (0.84-1.83)    | 0.28  | 1.18 (0.53-2.64) | 0.68  |
| race ethnicity Black or African American                 | 0.89 (0.86-0.93)   | <0.05 | 0.69 (0.65-0.73) | <0.05 | 0.75 (0.7-0.8)   | <0.05 | 1.01 (0.82-1.24)    | 0.96  | 2.27 (1.64-3.12) | <0.05 |
| Non Hispanic                                             | 0.75 (0.69-0.82)   | <0.05 | 0.69 (0.61-0.78) | <0.05 | 0.63 (0.53-0.74) | <0.05 | 0.98 (0.61-1.56)    | 0.92  | 0.82 (0.3-2.26)  | 0.7   |
| chronic resp                                             | 1.27 (1.22-1.32)   | <0.05 | 1.33 (1.26-1.41) | <0.05 | 1.19 (1.11-1.28) | <0.05 | 0.88 (0.72-1.07)    | 0.21  | 1.27 (0.84-1.92) | 0.25  |
| diabetes2                                                | 1.09 (1.04-1.14)   | <0.05 | 0.98 (0.92-1.05) | 0.64  | 1.26 (1.16-1.36) | <0.05 | 1.2 (1-1.43)        | 0.051 | 1.11 (0.72-1.72) | 0.64  |
| hepatic steatosis                                        | 0.94 (0.86-1.03)   | 0.17  | 0.94 (0.83-1.07) | 0.37  | 0.92 (0.78-1.07) | 0.27  | 0.65 (0.35-1.21)    | 0.18  | 0.25 (0.06-1.05) | 0.059 |
| hypertension                                             | 1.23 (1.19-1.28)   | <0.05 | 1.23 (1.17-1.3)  | <0.05 | 1.19 (1.12-1.27) | <0.05 | 1.43 (1.2-1.71)     | <0.05 | 0.79 (0.54-1.15) | 0.21  |
| hypertensive kidney disease                              | 0.87 (0.78-0.97)   | <0.05 | 0.89 (0.75-1.07) | 0.22  | 0.8 (0.66-0.96)  | <0.05 | 0.84 (0.62-1.14)    | 0.26  | 1.06 (0.38-2.93) | 0.91  |
| ischemic heart disease                                   | 0.89 (0.82-0.96)   | <0.05 | 0.89 (0.79-1)    | 0.058 | 1.02 (0.89-1.17) | 0.75  | 0.92 (0.72-1.17)    | 0.5   | 0.61 (0.27-1.41) | 0.25  |
| neoplasm                                                 | 1.12 (1.08-1.16)   | <0.05 | 1.15 (1.1-1.21)  | <0.05 | 0.98 (0.92-1.05) | 0.59  | 0.61 (0.51-0.73)    | <0.05 | 0.52 (0.33-0.8)  | <0.05 |
| nicotine dependence                                      | 1.42 (1.32-1.53)   | <0.05 | 1.39 (1.25-1.54) | <0.05 | 1.46 (1.29-1.66) | <0.05 | 0.77 (0.47-1.28)    | 0.31  | 1.95 (1.02-3.73) | <0.05 |
| non hypertensive                                         | 1.05 (0.97-1.14)   | 0.23  | 0.92 (0.81-1.05) | 0.22  | 1.23 (1.08-1.4)  | <0.05 | 1.4 (1.12-1.76)     | <0.05 | 0.92 (0.42-2.02) | 0.85  |
| chronic kidney disease                                   | 1.03 (0.99-1.08)   | 0.16  | 0.96 (0.9-1.03)  | 0.27  | 1.03 (0.95-1.11) | 0.49  | 1.49 (1.25-1.77)    | <0.05 | 0.94 (0.6-1.47)  | 0.79  |
| non ischemic heart disease                               | 0.97 (0.89-1.06)   | 0.46  | 0.86 (0.76-0.98) | <0.05 | 0.97 (0.84-1.13) | 0.73  | 0.52 (0.3-0.9)      | <0.05 | 3.51 (2-6.18)    | <0.05 |
| other liver disease                                      |                    |       |                  |       |                  |       |                     |       |                  |       |

**Table S13. Logistic Regression for All Factors and Outcomes for Outpatients Only.** To rule out our results being an artifact from mixing patients with inpatient and outpatient status, we repeated the analysis by separating inpatients and outpatients. Odds ratios, 95% confidence intervals, and p-values for the association of features in all factors and outcomes.

| Predictor                                                | All Mental Illness |       | Anxiety Disorder |       | Mood Disorder    |       | Dementia            |       | Psychosis        |       |
|----------------------------------------------------------|--------------------|-------|------------------|-------|------------------|-------|---------------------|-------|------------------|-------|
|                                                          | OR (CI)            | p-val | OR (CI)          | p-val | OR (CI)          | p-val | OR (CI)             | p-val | OR (CI)          | p-val |
| (Intercept)                                              | 0.02 (0.02-0.02)   | <0.05 | 0.01 (0.01-0.01) | <0.05 | 0.01 (0.01-0.01) | <0.05 | 0 (0-0)             | <0.05 | 0 (0-0)          | <0.05 |
| constitutional neurological                              | 1.7 (1.65-1.76)    | <0.05 | 1.79 (1.71-1.87) | <0.05 | 1.55 (1.46-1.64) | <0.05 | 1.33 (1.12-1.58)    | <0.05 | 1.07 (0.77-1.5)  | 0.69  |
| gastrointestinal                                         | 2.44 (2.37-2.51)   | <0.05 | 2.31 (2.23-2.4)  | <0.05 | 2.35 (2.24-2.46) | <0.05 | 2.94 (2.65-3.26)    | <0.05 | 3.93 (3.35-4.62) | <0.05 |
| pulmonary                                                | 1.47 (1.42-1.52)   | <0.05 | 1.48 (1.41-1.55) | <0.05 | 1.43 (1.35-1.51) | <0.05 | 1.17 (0.95-1.44)    | 0.13  | 1.07 (0.73-1.57) | 0.72  |
| cardiovascular                                           | 1.18 (1.12-1.24)   | <0.05 | 1.1 (1.02-1.18)  | <0.05 | 1.19 (1.09-1.3)  | <0.05 | 0.69 (0.51-0.92)    | <0.05 | 0.44 (0.22-0.89) | <0.05 |
| ENT                                                      | 1.91 (1.82-2.01)   | <0.05 | 2.22 (2.09-2.36) | <0.05 | 1.38 (1.25-1.52) | <0.05 | 1.54 (1.2-1.98)     | <0.05 | 1.64 (1-2.71)    | 0.052 |
| endocrine                                                | 1.25 (1.17-1.33)   | <0.05 | 1.31 (1.2-1.42)  | <0.05 | 1.07 (0.95-1.21) | 0.24  | 1.15 (0.83-1.58)    | 0.41  | 0.81 (0.41-1.6)  | 0.55  |
| age under 10                                             | 1.16 (1.07-1.25)   | <0.05 | 1.09 (0.98-1.22) | 0.12  | 1.45 (1.28-1.64) | <0.05 | 1.04 (0.71-1.52)    | 0.85  | 1.69 (0.9-3.18)  | 0.11  |
| age 10 to 19                                             | 1.09 (1-1.19)      | 0.052 | 0.52 (0.45-0.6)  | <0.05 | 0.24 (0.19-0.31) | <0.05 | 17.89 (11.73-27.28) | <0.05 | 0.44 (0.15-1.34) | 0.15  |
| age 20 to 29                                             | 1.6 (1.5-1.69)     | <0.05 | 1.43 (1.31-1.55) | <0.05 | 1.6 (1.44-1.78)  | <0.05 | 1.67 (1.04-2.68)    | <0.05 | 0.35 (0.15-0.79) | <0.05 |
| age 30 to 39                                             | 1.56 (1.49-1.64)   | <0.05 | 1.68 (1.57-1.79) | <0.05 | 1.59 (1.46-1.73) | <0.05 | 0.97 (0.61-1.54)    | 0.89  | 1.15 (0.71-1.87) | 0.57  |
| age 40 to 49                                             | 1.42 (1.35-1.49)   | <0.05 | 1.55 (1.45-1.65) | <0.05 | 1.32 (1.21-1.43) | <0.05 | 0.48 (0.27-0.83)    | <0.05 | 1.02 (0.63-1.65) | 0.93  |
| age 50 to 59                                             | 1.15 (1.09-1.21)   | <0.05 | 1.23 (1.15-1.31) | <0.05 | 1.05 (0.97-1.15) | 0.22  | 0.77 (0.48-1.23)    | 0.28  | 0.6 (0.35-1.04)  | 0.068 |
| age 60 to 69                                             | 1                  | REF   | 1                | REF   | 1                | REF   | 1                   | REF   | 1                | REF   |
| age 70 to 79                                             | 0.89 (0.84-0.93)   | <0.05 | 0.8 (0.74-0.86)  | <0.05 | 0.94 (0.86-1.02) | 0.15  | 2.11 (1.45-3.07)    | <0.05 | 1.29 (0.8-2.08)  | 0.3   |
| age over 80                                              | 0.84 (0.79-0.9)    | <0.05 | 0.68 (0.62-0.75) | <0.05 | 0.89 (0.8-1)     | <0.05 | 6.5 (4.59-9.21)     | <0.05 | 1.11 (0.6-2.05)  | 0.74  |
| BMI under 20                                             | 0.92 (0.83-1.01)   | 0.091 | 0.59 (0.5-0.69)  | <0.05 | 0.75 (0.63-0.89) | <0.05 | 19.71 (13.85-28.05) | <0.05 | 2.73 (1.37-5.42) | <0.05 |
| BMI 20 to 25                                             | 0.94 (0.86-1.03)   | 0.19  | 0.91 (0.81-1.03) | 0.15  | 0.75 (0.62-0.9)  | <0.05 | 0.15 (0.07-0.32)    | <0.05 | 0.66 (0.22-1.97) | 0.46  |
| BMI 25 to 30                                             | 0.99 (0.93-1.05)   | 0.77  | 0.98 (0.91-1.07) | 0.71  | 0.94 (0.86-1.03) | 0.19  | 0.97 (0.72-1.31)    | 0.84  | 0.93 (0.53-1.64) | 0.81  |
| BMI 30 to 35                                             | 1                  | REF   | 1                | REF   | 1                | REF   | 1                   | REF   | 1                | REF   |
| BMI 35 to 40                                             | 1.03 (0.97-1.09)   | 0.31  | 1.03 (0.95-1.12) | 0.48  | 1.05 (0.96-1.14) | 0.29  | 1.02 (0.75-1.38)    | 0.91  | 1.07 (0.63-1.81) | 0.8   |
| BMI over 40                                              | 1.03 (0.96-1.12)   | 0.38  | 1.03 (0.92-1.15) | 0.65  | 1.1 (0.98-1.23)  | 0.11  | 0.91 (0.6-1.38)     | 0.66  | 0.82 (0.36-1.88) | 0.63  |
| gender MALE                                              | 1.09 (1.01-1.16)   | <0.05 | 1.06 (0.96-1.16) | 0.24  | 1.19 (1.08-1.32) | <0.05 | 0.94 (0.61-1.46)    | 0.79  | 1.15 (0.64-2.06) | 0.63  |
| gender FEMALE                                            | 0.65 (0.63-0.67)   | <0.05 | 0.51 (0.49-0.53) | <0.05 | 0.46 (0.44-0.49) | <0.05 | 0.68 (0.58-0.8)     | <0.05 | 1.12 (0.85-1.49) | 0.42  |
| smoking status                                           | 1                  | REF   | 1                | REF   | 1                | REF   | 1                   | REF   | 1                | REF   |
| race ethnicity White                                     | 1.25 (1.12-1.4)    | <0.05 | 1.11 (0.95-1.3)  | 0.18  | 1.22 (1.02-1.46) | <0.05 | 1.43 (0.67-3.06)    | 0.35  | 1.28 (0.49-3.35) | 0.62  |
| Non Hispanic                                             | 1                  | REF   | 1                | REF   | 1                | REF   | 1                   | REF   | 1                | REF   |
| race ethnicity Other                                     | 0.66 (0.58-0.75)   | <0.05 | 0.56 (0.47-0.68) | <0.05 | 0.59 (0.46-0.74) | <0.05 | 0.92 (0.47-1.8)     | 0.81  | 0.81 (0.2-3.3)   | 0.77  |
| Non Hispanic                                             |                    |       |                  |       |                  |       |                     |       |                  |       |
| race ethnicity Native Hawaiian or Other Pacific Islander | 0.88 (0.57-1.35)   | 0.56  | 0.75 (0.4-1.4)   | 0.36  | 0.8 (0.38-1.7)   | 0.57  | NA                  | NA    | NA               | NA    |
| Non Hispanic                                             |                    |       |                  |       |                  |       |                     |       |                  |       |
| race ethnicity Hispanic or Latino                        | 1.06 (1.02-1.1)    | <0.05 | 0.98 (0.93-1.04) | 0.48  | 0.91 (0.84-0.97) | <0.05 | 0.84 (0.63-1.12)    | 0.23  | 1.48 (0.96-2.27) | 0.074 |
| Race                                                     |                    |       |                  |       |                  |       |                     |       |                  |       |
| race ethnicity Unknown                                   | 1.06 (0.98-1.14)   | 0.15  | 1.02 (0.92-1.13) | 0.68  | 0.83 (0.72-0.96) | <0.05 | 1.28 (0.83-1.97)    | 0.27  | 1.08 (0.44-2.64) | 0.87  |
| race ethnicity Black or African American                 | 0.89 (0.86-0.93)   | <0.05 | 0.68 (0.64-0.73) | <0.05 | 0.77 (0.71-0.82) | <0.05 | 0.93 (0.72-1.2)     | 0.58  | 2.2 (1.55-3.13)  | <0.05 |
| Non Hispanic                                             |                    |       |                  |       |                  |       |                     |       |                  |       |
| race ethnicity Asian                                     | 0.75 (0.68-0.82)   | <0.05 | 0.69 (0.6-0.79)  | <0.05 | 0.61 (0.51-0.73) | <0.05 | 1.24 (0.76-2.03)    | 0.39  | 0.73 (0.23-2.32) | 0.6   |
| Non Hispanic                                             |                    |       |                  |       |                  |       |                     |       |                  |       |
| chronic resp                                             | 1.3 (1.24-1.35)    | <0.05 | 1.35 (1.27-1.43) | <0.05 | 1.21 (1.12-1.3)  | <0.05 | 0.92 (0.73-1.16)    | 0.48  | 1.24 (0.79-1.94) | 0.36  |
| diabetes2                                                | 1.1 (1.04-1.16)    | <0.05 | 0.97 (0.9-1.05)  | 0.42  | 1.28 (1.17-1.39) | <0.05 | 1.21 (0.97-1.5)     | 0.092 | 1.26 (0.79-2.02) | 0.33  |
| hepatic steatosis                                        | 0.91 (0.82-1.01)   | 0.069 | 0.92 (0.8-1.06)  | 0.23  | 0.94 (0.79-1.11) | 0.45  | 0.6 (0.29-1.25)     | 0.18  | 0.23 (0.05-1.03) | 0.055 |
| hypertension                                             | 1.23 (1.18-1.28)   | <0.05 | 1.22 (1.16-1.3)  | <0.05 | 1.2 (1.12-1.29)  | <0.05 | 1.44 (1.18-1.77)    | <0.05 | 0.79 (0.53-1.19) | 0.26  |
| hypertensive kidney disease                              | 0.95 (0.83-1.09)   | 0.44  | 1.05 (0.85-1.31) | 0.63  | 0.85 (0.68-1.06) | 0.14  | 0.9 (0.61-1.33)     | 0.58  | 1.16 (0.35-3.9)  | 0.81  |
| ischemic heart disease                                   | 0.93 (0.85-1.02)   | 0.13  | 0.95 (0.83-1.08) | 0.43  | 1.05 (0.9-1.22)  | 0.55  | 0.89 (0.65-1.2)     | 0.43  | 0.5 (0.19-1.36)  | 0.18  |
| neoplasm                                                 | 1.14 (1.09-1.18)   | <0.05 | 1.15 (1.09-1.21) | <0.05 | 0.97 (0.91-1.04) | 0.4   | 0.62 (0.5-0.77)     | <0.05 | 0.5 (0.31-0.8)   | <0.05 |
| nicotine dependence                                      | 1.45 (1.34-1.57)   | <0.05 | 1.42 (1.27-1.59) | <0.05 | 1.53 (1.34-1.75) | <0.05 | 0.9 (0.5-1.6)       | 0.71  | 1.68 (0.81-3.47) | 0.16  |
| non hypertensive chronic kidney disease                  | 1.05 (0.96-1.16)   | 0.29  | 0.9 (0.77-1.04)  | 0.15  | 1.31 (1.13-1.52) | <0.05 | 1.38 (1.03-1.84)    | <0.05 | 0.84 (0.33-2.09) | 0.7   |
| non ischemic heart disease                               | 1.01 (0.96-1.06)   | 0.67  | 0.93 (0.86-1)    | <0.05 | 0.99 (0.91-1.08) | 0.87  | 1.53 (1.25-1.88)    | <0.05 | 0.97 (0.6-1.56)  | 0.89  |
| other liver disease                                      | 0.94 (0.86-1.04)   | 0.25  | 0.86 (0.75-0.99) | <0.05 | 0.99 (0.84-1.16) | 0.88  | 0.36 (0.17-0.79)    | <0.05 | 3.91 (2.13-7.19) | <0.05 |

**Table S14. Logistic Regression for All Factors and Outcomes for Inpatients Only.** To rule out our results being an artifact from mixing patients with inpatient and outpatient status, we repeated the analysis by separating inpatients and outpatients. Odds ratios, 95% confidence intervals, and p-values for the association of features in all factors and outcomes.

| Predictor                                                | All Mental Illness |       |  | Anxiety Disorder |       |  | Mood Disorder    |       |  | Dementia          |       |  | Psychosis         |       |  |
|----------------------------------------------------------|--------------------|-------|--|------------------|-------|--|------------------|-------|--|-------------------|-------|--|-------------------|-------|--|
|                                                          | OR (CI)            | p-val |  | OR (CI)          | p-val |  | OR (CI)          | p-val |  | OR (CI)           | p-val |  | OR (CI)           | p-val |  |
| (Intercept)                                              | 0.02 (0.02-0.03)   | <0.05 |  | 0.01 (0.01-0.01) | <0.05 |  | 0.01 (0-0.01)    | <0.05 |  | 0 (0-0)           | <0.05 |  | 0 (0-0)           | <0.05 |  |
| constitutional neurological                              | 1.25 (1.16-1.35)   | <0.05 |  | 1.23 (1.1-1.37)  | <0.05 |  | 1.31 (1.15-1.49) | <0.05 |  | 1.31 (1.04-1.64)  | <0.05 |  | 1.05 (0.47-2.31)  | 0.91  |  |
| gastrointestinal                                         | 1.91 (1.8-2.02)    | <0.05 |  | 1.69 (1.55-1.84) | <0.05 |  | 1.72 (1.56-1.9)  | <0.05 |  | 2.52 (2.2-2.9)    | <0.05 |  | 2.77 (1.88-4.07)  | <0.05 |  |
| pulmonary                                                | 1.33 (1.24-1.44)   | <0.05 |  | 1.36 (1.22-1.51) | <0.05 |  | 1.36 (1.2-1.55)  | <0.05 |  | 1.05 (0.79-1.4)   | 0.74  |  | 0.26 (0.04-1.82)  | 0.17  |  |
| cardiovascular                                           | 1.15 (1.06-1.23)   | <0.05 |  | 1.2 (1.08-1.34)  | <0.05 |  | 1.06 (0.93-1.22) | 0.37  |  | 0.96 (0.73-1.25)  | 0.76  |  | 1.21 (0.58-2.52)  | 0.6   |  |
| ENT                                                      | 1.5 (1.37-1.65)    | <0.05 |  | 1.56 (1.36-1.79) | <0.05 |  | 1.26 (1.05-1.51) | <0.05 |  | 1.51 (1.12-2.02)  | <0.05 |  | 1.17 (0.38-3.59)  | 0.78  |  |
| endocrine                                                | 1.01 (0.85-1.19)   | 0.95  |  | 1.2 (0.95-1.52)  | 0.13  |  | 1.1 (0.83-1.47)  | 0.5   |  | 0.94 (0.57-1.55)  | 0.82  |  | 0.71 (0.1-4.87)   | 0.72  |  |
| age under 10                                             | 0.99 (0.85-1.16)   | 0.93  |  | 0.91 (0.72-1.16) | 0.46  |  | 1.07 (0.82-1.4)  | 0.61  |  | 0.59 (0.33-1.04)  | 0.066 |  | 0.58 (0.08-4.21)  | 0.59  |  |
| age 10 to 19                                             | 1.26 (1.03-1.55)   | <0.05 |  | 0.54 (0.36-0.82) | <0.05 |  | 1.08 (0.73-1.6)  | 0.7   |  | 9.78 (5.54-17.27) | <0.05 |  | 1.24 (0.2-7.66)   | 0.82  |  |
| age 20 to 29                                             | 1.79 (1.39-2.31)   | <0.05 |  | 1.75 (1.18-2.59) | <0.05 |  | 2.08 (1.33-3.25) | <0.05 |  | 1.62 (0.47-5.62)  | 0.45  |  | 0.98 (0.11-8.88)  | 0.99  |  |
| age 30 to 39                                             | 1.81 (1.52-2.16)   | <0.05 |  | 1.9 (1.45-2.48)  | <0.05 |  | 2.13 (1.56-2.9)  | <0.05 |  | 0.22 (0.03-1.65)  | 0.14  |  | 1.53 (0.43-5.45)  | 0.51  |  |
| age 40 to 49                                             | 1.41 (1.19-1.66)   | <0.05 |  | 1.59 (1.24-2.03) | <0.05 |  | 1.55 (1.16-2.09) | <0.05 |  | 0.15 (0.02-1.12)  | 0.064 |  | 1.27 (0.36-4.41)  | 0.71  |  |
| age 50 to 59                                             | 1.3 (1.12-1.51)    | <0.05 |  | 1.73 (1.4-2.14)  | <0.05 |  | 1.29 (0.98-1.7)  | 0.07  |  | 0.19 (0.04-0.83)  | <0.05 |  | 0.47 (0.09-2.38)  | 0.36  |  |
| age 60 to 69                                             | 1.17 (1.02-1.34)   | <0.05 |  | 1.43 (1.18-1.74) | <0.05 |  | 1.09 (0.85-1.4)  | 0.52  |  | 0.24 (0.08-0.7)   | <0.05 |  | 0.36 (0.07-1.79)  | 0.21  |  |
| age 70 to 79                                             | 1                  | REF   |  | 1                | REF   |  | 1                | REF   |  | 1                 | REF   |  | 1                 | REF   |  |
| age over 80                                              | 1.06 (0.93-1.21)   | 0.38  |  | 0.91 (0.74-1.13) | 0.4   |  | 1.13 (0.89-1.43) | 0.33  |  | 3.37 (2.01-5.64)  | <0.05 |  | 1.24 (0.39-3.92)  | 0.72  |  |
| BMI under 20                                             | 1.07 (0.9-1.27)    | 0.43  |  | 0.87 (0.66-1.15) | 0.33  |  | 0.8 (0.57-1.14)  | 0.22  |  | 8.85 (5.29-14.81) | <0.05 |  | 0.5 (0.06-4.33)   | 0.53  |  |
| BMI 20 to 25                                             | 1.02 (0.76-1.36)   | 0.91  |  | 1.23 (0.76-2)    | 0.39  |  | 1.05 (0.6-1.83)  | 0.87  |  | 0.36 (0.12-1.11)  | 0.076 |  | 0.59 (0.06-6.2)   | 0.66  |  |
| BMI 25 to 30                                             | 1.11 (0.95-1.3)    | 0.19  |  | 1.05 (0.81-1.35) | 0.71  |  | 1.02 (0.72-1.43) | 0.93  |  | 1.41 (0.88-2.27)  | 0.15  |  | 0.51 (0.1-2.74)   | 0.44  |  |
| BMI 30 to 35                                             | 0.98 (0.85-1.13)   | 0.73  |  | 0.98 (0.78-1.23) | 0.87  |  | 1.04 (0.8-1.37)  | 0.76  |  | 0.96 (0.62-1.49)  | 0.86  |  | 0.59 (0.15-2.41)  | 0.46  |  |
| BMI 35 to 40                                             | 1                  | REF   |  | 1                | REF   |  | 1                | REF   |  | 1                 | REF   |  | 1                 | REF   |  |
| BMI 40 to 45                                             | 0.99 (0.85-1.16)   | 0.92  |  | 1.04 (0.82-1.32) | 0.72  |  | 1.21 (0.91-1.6)  | 0.18  |  | 0.74 (0.39-1.41)  | 0.36  |  | 0.83 (0.2-3.4)    | 0.8   |  |
| BMI over 40                                              | 1.06 (0.92-1.22)   | 0.42  |  | 1.06 (0.86-1.31) | 0.56  |  | 1.34 (1.04-1.73) | <0.05 |  | 0.75 (0.44-1.3)   | 0.31  |  | 0.71 (0.21-2.39)  | 0.58  |  |
| gender MALE                                              | 1                  | REF   |  | 1                | REF   |  | 1                | REF   |  | 1                 | REF   |  | 1                 | REF   |  |
| gender FEMALE                                            | 1.19 (1.1-1.29)    | <0.05 |  | 1.37 (1.21-1.55) | <0.05 |  | 1.6 (1.37-1.87)  | <0.05 |  | 1.06 (0.8-1.41)   | 0.68  |  | 5.96 (2.03-17.5)  | <0.05 |  |
| smoking status                                           | 1.24 (0.97-1.59)   | 0.081 |  | 1.11 (0.75-1.65) | 0.59  |  | 1.39 (0.86-2.24) | 0.18  |  | 0.53 (0.11-2.54)  | 0.43  |  | NA                | NA    |  |
| race ethnicity White                                     | 1                  | REF   |  | 1                | REF   |  | 1                | REF   |  | 1                 | REF   |  | 1                 | REF   |  |
| Non Hispanic                                             |                    |       |  |                  |       |  |                  |       |  |                   |       |  |                   |       |  |
| race ethnicity Other                                     | 0.73 (0.46-1.16)   | 0.18  |  | 0.99 (0.55-1.78) | 0.97  |  | 0.84 (0.4-1.79)  | 0.65  |  | NA                | NA    |  | NA                | NA    |  |
| Non Hispanic                                             |                    |       |  |                  |       |  |                  |       |  |                   |       |  |                   |       |  |
| race ethnicity Native Hawaiian or Other Pacific Islander | 0.83 (0.3-2.29)    | 0.72  |  | 0.9 (0.22-3.7)   | 0.88  |  | 0.66 (0.09-4.77) | 0.68  |  | NA                | NA    |  | NA                | NA    |  |
| Non Hispanic                                             |                    |       |  |                  |       |  |                  |       |  |                   |       |  |                   |       |  |
| race ethnicity Hispanic or Latino                        | 0.85 (0.75-0.96)   | <0.05 |  | 0.79 (0.66-0.94) | <0.05 |  | 0.68 (0.54-0.85) | <0.05 |  | 1.07 (0.66-1.75)  | 0.78  |  | 0.87 (0.23-3.24)  | 0.83  |  |
| Any Race                                                 |                    |       |  |                  |       |  |                  |       |  |                   |       |  |                   |       |  |
| race ethnicity Unknown                                   | 1.07 (0.86-1.34)   | 0.55  |  | 0.95 (0.68-1.34) | 0.78  |  | 0.98 (0.65-1.47) | 0.92  |  | 1.16 (0.48-2.77)  | 0.74  |  | 3.09 (0.67-14.37) | 0.15  |  |
| race ethnicity Black or African American                 | 0.83 (0.75-0.93)   | <0.05 |  | 0.64 (0.55-0.76) | <0.05 |  | 0.59 (0.48-0.72) | <0.05 |  | 1.23 (0.86-1.76)  | 0.25  |  | 2.53 (1.08-5.89)  | <0.05 |  |
| Non Hispanic                                             |                    |       |  |                  |       |  |                  |       |  |                   |       |  |                   |       |  |
| race ethnicity Asian                                     | 0.73 (0.56-0.95)   | <0.05 |  | 0.63 (0.41-0.95) | <0.05 |  | 0.65 (0.39-1.09) | 0.1   |  | 0.28 (0.07-1.21)  | 0.09  |  | 1.52 (0.18-13.11) | 0.7   |  |
| Non Hispanic                                             |                    |       |  |                  |       |  |                  |       |  |                   |       |  |                   |       |  |
| chronic resp                                             | 1.07 (0.96-1.19)   | 0.24  |  | 1.13 (0.96-1.33) | 0.14  |  | 1.06 (0.87-1.3)  | 0.56  |  | 0.78 (0.55-1.12)  | 0.18  |  | 1.46 (0.55-3.89)  | 0.45  |  |
| diabetes2                                                | 1.08 (0.97-1.19)   | 0.16  |  | 1.04 (0.89-1.22) | 0.59  |  | 1.21 (1.01-1.46) | <0.05 |  | 1.2 (0.88-1.65)   | 0.25  |  | 0.64 (0.21-1.91)  | 0.42  |  |
| hepatic steatosis                                        | 1.03 (0.83-1.27)   | 0.81  |  | 1.02 (0.75-1.39) | 0.92  |  | 0.71 (0.46-1.09) | 0.12  |  | 0.73 (0.23-2.36)  | 0.6   |  | NA                | NA    |  |
| hypertension                                             | 1.12 (1.02-1.23)   | <0.05 |  | 1.16 (1-1.35)    | <0.05 |  | 0.99 (0.83-1.19) | 0.94  |  | 1.24 (0.88-1.75)  | 0.21  |  | 0.63 (0.24-1.64)  | 0.34  |  |
| hypertensive kidney disease                              | 0.85 (0.71-1.03)   | 0.098 |  | 0.75 (0.55-1.03) | 0.077 |  | 0.85 (0.6-1.22)  | 0.39  |  | 0.77 (0.48-1.23)  | 0.27  |  | 0.93 (0.13-6.74)  | 0.95  |  |
| ischemic heart disease                                   | 0.81 (0.69-0.94)   | <0.05 |  | 0.76 (0.59-0.97) | <0.05 |  | 0.99 (0.75-1.3)  | 0.92  |  | 0.95 (0.64-1.42)  | 0.81  |  | 1.11 (0.22-5.56)  | 0.9   |  |
| neoplasm                                                 | 0.98 (0.88-1.08)   | 0.63  |  | 1.09 (0.94-1.26) | 0.24  |  | 0.97 (0.81-1.17) | 0.78  |  | 0.54 (0.38-0.76)  | <0.05 |  | 0.56 (0.19-1.72)  | 0.31  |  |
| nicotine dependence                                      | 1.15 (0.94-1.41)   | 0.18  |  | 1.04 (0.76-1.43) | 0.8   |  | 0.91 (0.6-1.38)  | 0.66  |  | 0.44 (0.15-1.36)  | 0.16  |  | 2.95 (0.68-12.81) | 0.15  |  |
| non hypertensive                                         | 1.05 (0.91-1.21)   | 0.5   |  | 0.98 (0.78-1.23) | 0.85  |  | 1.01 (0.77-1.33) | 0.93  |  | 1.48 (1.02-2.15)  | <0.05 |  | 1.13 (0.25-5.15)  | 0.87  |  |
| chronic kidney disease                                   |                    |       |  |                  |       |  |                  |       |  |                   |       |  |                   |       |  |
| non ischemic heart disease                               | 1.09 (0.99-1.21)   | 0.087 |  | 1.09 (0.93-1.28) | 0.28  |  | 1.12 (0.93-1.36) | 0.24  |  | 1.3 (0.94-1.8)    | 0.12  |  | 0.86 (0.3-2.44)   | 0.78  |  |
| other liver disease                                      | 1.08 (0.9-1.29)    | 0.41  |  | 0.89 (0.67-1.19) | 0.44  |  | 0.98 (0.69-1.39) | 0.92  |  | 0.9 (0.42-1.92)   | 0.79  |  | 2.25 (0.49-10.27) | 0.3   |  |



**Table S15. Logistic Regression for All Factors and Outcomes for Patients Without Missing Data.** To identify whether BMI imputation could have introduced error, we repeated the analysis looking only at patients without data missingness. Odds ratios, 95% confidence intervals, and p-values for the association of features in all factors and outcomes.

| Predictor                                                             | All Mental Illness |       |  | Anxiety Disorder |       |  | Mood Disorder    |       |  | Dementia           |       |  | Psychosis        |       |  |
|-----------------------------------------------------------------------|--------------------|-------|--|------------------|-------|--|------------------|-------|--|--------------------|-------|--|------------------|-------|--|
|                                                                       | OR (CI)            | p-val |  | OR (CI)          | p-val |  | OR (CI)          | p-val |  | OR (CI)            | p-val |  | OR (CI)          | p-val |  |
| (Intercept)                                                           | 0.03 (0.03-0.03)   | <0.05 |  | 0.02 (0.02-0.02) | <0.05 |  | 0.01 (0.01-0.01) | <0.05 |  | 0 (0-0)            | <0.05 |  | 0 (0-0)          | <0.05 |  |
| constitutional neurological                                           | 1.48 (1.42-1.54)   | <0.05 |  | 1.51 (1.43-1.59) | <0.05 |  | 1.42 (1.32-1.52) | <0.05 |  | 1.14 (0.94-1.38)   | 0.184 |  | 1.04 (0.66-1.65) | 0.866 |  |
| gastrointestinal                                                      | 1.92 (1.85-1.98)   | <0.05 |  | 1.82 (1.74-1.91) | <0.05 |  | 1.8 (1.7-1.91)   | <0.05 |  | 2.34 (2.09-2.62)   | <0.05 |  | 3.25 (2.63-4.03) | <0.05 |  |
| pulmonary                                                             | 1.34 (1.28-1.39)   | <0.05 |  | 1.35 (1.28-1.43) | <0.05 |  | 1.36 (1.27-1.46) | <0.05 |  | 1.15 (0.93-1.42)   | 0.205 |  | 1.01 (0.6-1.71)  | 0.969 |  |
| cardiovascular                                                        | 1.06 (1.01-1.12)   | <0.05 |  | 1.03 (0.96-1.11) | 0.375 |  | 1.06 (0.97-1.17) | 0.247 |  | 0.81 (0.63-1.04)   | 0.086 |  | 0.76 (0.4-1.46)  | 0.409 |  |
| ENT                                                                   | 1.65 (1.56-1.75)   | <0.05 |  | 1.88 (1.74-2.02) | <0.05 |  | 1.25 (1.11-1.4)  | <0.05 |  | 1.51 (1.18-1.92)   | <0.05 |  | 0.55 (0.2-1.53)  | 0.255 |  |
| endocrine                                                             | 1.2 (1.11-1.29)    | <0.05 |  | 1.32 (1.2-1.46)  | <0.05 |  | 1.11 (0.97-1.26) | 0.152 |  | 1.4 (1.03-1.92)    | <0.05 |  | 0.33 (0.08-1.34) | 0.121 |  |
| age under 10                                                          | 1.04 (0.95-1.14)   | 0.351 |  | 0.96 (0.84-1.09) | 0.547 |  | 1.42 (1.23-1.64) | <0.05 |  | 0.91 (0.61-1.36)   | 0.665 |  | 2.12 (1.02-4.41) | <0.05 |  |
| age 10 to 19                                                          | 1.06 (0.96-1.17)   | 0.222 |  | 0.46 (0.38-0.55) | <0.05 |  | 0.38 (0.28-0.5)  | <0.05 |  | 15.03 (9.13-24.74) | <0.05 |  | 1.67 (0.56-4.92) | 0.353 |  |
| age 20 to 29                                                          | 1.63 (1.51-1.76)   | <0.05 |  | 1.49 (1.34-1.66) | <0.05 |  | 1.93 (1.69-2.22) | <0.05 |  | 2.77 (1.48-5.18)   | <0.05 |  | 0.48 (0.13-1.72) | 0.257 |  |
| age 30 to 39                                                          | 1.55 (1.45-1.66)   | <0.05 |  | 1.68 (1.54-1.84) | <0.05 |  | 1.63 (1.45-1.84) | <0.05 |  | 1.04 (0.51-2.12)   | 0.922 |  | 0.69 (0.28-1.73) | 0.432 |  |
| age 40 to 49                                                          | 1.31 (1.23-1.41)   | <0.05 |  | 1.45 (1.33-1.58) | <0.05 |  | 1.23 (1.1-1.39)  | <0.05 |  | 0.47 (0.2-1.11)    | 0.086 |  | 1.02 (0.48-2.16) | 0.951 |  |
| age 50 to 59                                                          | 1.15 (1.08-1.23)   | <0.05 |  | 1.25 (1.14-1.36) | <0.05 |  | 1.03 (0.91-1.16) | 0.607 |  | 0.75 (0.38-1.48)   | 0.408 |  | 0.34 (0.12-0.93) | <0.05 |  |
| age 60 to 69                                                          | 1                  | REF   |  | 1                | REF   |  | 1                | REF   |  | 1                  | REF   |  | 1                | REF   |  |
| age 70 to 79                                                          | 0.88 (0.82-0.94)   | <0.05 |  | 0.76 (0.69-0.84) | <0.05 |  | 0.92 (0.82-1.04) | 0.207 |  | 1.77 (1.06-2.95)   | <0.05 |  | 0.79 (0.37-1.67) | 0.524 |  |
| age over 80                                                           | 0.9 (0.83-0.97)    | <0.05 |  | 0.7 (0.62-0.79)  | <0.05 |  | 1 (0.87-1.15)    | 0.97  |  | 5.16 (3.22-8.25)   | <0.05 |  | 1.38 (0.64-2.95) | 0.411 |  |
| BMI under 20                                                          | 0.96 (0.85-1.08)   | 0.508 |  | 0.63 (0.51-0.76) | <0.05 |  | 0.9 (0.72-1.12)  | 0.325 |  | 14.88 (9.23-23.98) | <0.05 |  | 2.18 (0.81-5.84) | 0.122 |  |
| BMI 20 to 25                                                          | 0.87 (0.79-0.95)   | <0.05 |  | 0.9 (0.78-1.03)  | 0.132 |  | 0.55 (0.45-0.69) | <0.05 |  | 0.05 (0.02-0.13)   | <0.05 |  | 0.26 (0.05-1.37) | 0.113 |  |
| BMI 25 to 30                                                          | 0.96 (0.91-1.02)   | 0.197 |  | 0.91 (0.85-0.99) | <0.05 |  | 0.83 (0.74-0.92) | <0.05 |  | 1.08 (0.79-1.49)   | 0.603 |  | 1.23 (0.59-2.59) | 0.574 |  |
| BMI 30 to 35                                                          | 1                  | REF   |  | 1                | REF   |  | 1                | REF   |  | 1                  | REF   |  | 1                | REF   |  |
| BMI 35 to 40                                                          | 1.03 (0.98-1.09)   | 0.277 |  | 1.03 (0.96-1.11) | 0.471 |  | 1.04 (0.95-1.14) | 0.394 |  | 1.01 (0.77-1.33)   | 0.939 |  | 1.14 (0.6-2.17)  | 0.685 |  |
| BMI over 40                                                           | 1.07 (1.01-1.14)   | <0.05 |  | 1.03 (0.95-1.12) | 0.454 |  | 1.26 (1.13-1.4)  | <0.05 |  | 0.85 (0.6-1.21)    | 0.365 |  | 1.39 (0.69-2.81) | 0.357 |  |
| gender MALE                                                           | 1.14 (1.07-1.21)   | <0.05 |  | 1.06 (0.98-1.15) | 0.14  |  | 1.45 (1.31-1.6)  | <0.05 |  | 0.77 (0.52-1.13)   | 0.182 |  | 1.32 (0.64-2.75) | 0.447 |  |
| gender FEMALE                                                         | 0.68 (0.66-0.71)   | <0.05 |  | 0.55 (0.52-0.59) | <0.05 |  | 0.52 (0.48-0.56) | <0.05 |  | 0.85 (0.69-1.05)   | 0.125 |  | 0.86 (0.55-1.35) | 0.505 |  |
| smoking status                                                        | 1                  | REF   |  | 1                | REF   |  | 1                | REF   |  | 1                  | REF   |  | 1                | REF   |  |
| length of stay 0d                                                     | 1.22 (1.08-1.38)   | <0.05 |  | 1.09 (0.92-1.31) | 0.308 |  | 1.31 (1.06-1.62) | <0.05 |  | 1.4 (0.66-2.97)    | 0.369 |  | 1.34 (0.39-4.52) | 0.641 |  |
| length of stay 1d                                                     | 1                  | REF   |  | 1                | REF   |  | 1                | REF   |  | 1                  | REF   |  | 1                | REF   |  |
| length of stay 2d 3d                                                  | 1.2 (1.07-1.34)    | <0.05 |  | 1.02 (0.86-1.21) | 0.785 |  | 0.98 (0.78-1.23) | 0.858 |  | 1.79 (1.06-3.01)   | <0.05 |  | 1.49 (0.46-4.85) | 0.502 |  |
| length of stay 4d 7d                                                  | 1.09 (0.98-1.23)   | 0.109 |  | 0.81 (0.67-0.98) | <0.05 |  | 1.09 (0.89-1.34) | 0.409 |  | 1.68 (1.09-2.6)    | <0.05 |  | 2.01 (0.78-5.19) | 0.147 |  |
| length of stay in gt 7d                                               | 1.09 (0.99-1.22)   | 0.077 |  | 0.9 (0.77-1.07)  | 0.249 |  | 1.12 (0.93-1.34) | 0.24  |  | 2.16 (1.55-3.01)   | <0.05 |  | 1.7 (0.7-4.11)   | 0.242 |  |
| race ethnicity White                                                  | 1.62 (1.46-1.79)   | <0.05 |  | 1.43 (1.22-1.68) | <0.05 |  | 1.22 (1-1.5)     | 0.058 |  | 2.53 (1.81-3.54)   | <0.05 |  | 0.66 (0.15-2.85) | 0.585 |  |
| Non Hispanic                                                          | 1                  | REF   |  | 1                | REF   |  | 1                | REF   |  | 1                  | REF   |  | 1                | REF   |  |
| race ethnicity Other Non Hispanic                                     | 0.91 (0.75-1.11)   | 0.385 |  | 0.71 (0.53-0.96) | <0.05 |  | 1.05 (0.75-1.47) | 0.75  |  | 0.89 (0.22-3.6)    | 0.871 |  | NA               | NA    |  |
| race ethnicity Native Hawaiian or Other Pacific Islander Non Hispanic | 0.5 (0.29-0.85)    | <0.05 |  | 0.33 (0.14-0.8)  | <0.05 |  | 0.44 (0.17-1.19) | 0.109 |  | NA                 | NA    |  | NA               | NA    |  |
| race ethnicity Hispanic or Latino Any Race                            | 0.96 (0.92-1.01)   | 0.112 |  | 0.86 (0.81-0.92) | <0.05 |  | 0.84 (0.76-0.91) | <0.05 |  | 0.92 (0.66-1.29)   | 0.619 |  | 0.68 (0.33-1.4)  | 0.297 |  |
| race ethnicity Unknown                                                | 0.86 (0.79-0.94)   | <0.05 |  | 0.79 (0.7-0.89)  | <0.05 |  | 0.72 (0.61-0.85) | <0.05 |  | 1.38 (0.86-2.21)   | 0.187 |  | 1.04 (0.37-2.91) | 0.939 |  |
| race ethnicity Black or African American Non Hispanic                 | 0.8 (0.76-0.85)    | <0.05 |  | 0.62 (0.57-0.67) | <0.05 |  | 0.69 (0.63-0.76) | <0.05 |  | 1.15 (0.87-1.52)   | 0.337 |  | 1.09 (0.62-1.92) | 0.764 |  |
| race ethnicity Asian Non Hispanic                                     | 0.68 (0.61-0.77)   | <0.05 |  | 0.59 (0.5-0.69)  | <0.05 |  | 0.63 (0.5-0.78)  | <0.05 |  | 1.04 (0.57-1.89)   | 0.898 |  | 0.3 (0.04-2.31)  | 0.252 |  |
| chronic resp                                                          | 1.12 (1.06-1.17)   | <0.05 |  | 1.15 (1.07-1.23) | <0.05 |  | 1.08 (0.99-1.19) | 0.107 |  | 0.81 (0.62-1.06)   | 0.128 |  | 1.51 (0.88-2.58) | 0.132 |  |
| diabetes2                                                             | 1.06 (1-1.13)      | <0.05 |  | 0.96 (0.88-1.05) | 0.381 |  | 1.16 (1.05-1.29) | <0.05 |  | 1.27 (0.99-1.63)   | 0.055 |  | 1.05 (0.57-1.94) | 0.879 |  |
| hepatic steatosis                                                     | 0.88 (0.78-0.98)   | <0.05 |  | 0.9 (0.77-1.06)  | 0.233 |  | 0.87 (0.71-1.06) | 0.18  |  | 0.8 (0.39-1.65)    | 0.547 |  | 0.44 (0.1-1.91)  | 0.271 |  |
| hypertension                                                          | 1.05 (1-1.11)      | <0.05 |  | 1.05 (0.98-1.13) | 0.146 |  | 0.98 (0.9-1.07)  | 0.633 |  | 1.72 (1.3-2.26)    | <0.05 |  | 1.42 (0.82-2.46) | 0.207 |  |
| hypertensive kidney disease                                           | 0.88 (0.77-1.01)   | 0.068 |  | 0.89 (0.71-1.1)  | 0.278 |  | 0.73 (0.57-0.92) | <0.05 |  | 0.9 (0.6-1.35)     | 0.635 |  | 1.36 (0.34-5.53) | 0.663 |  |
| ischemic heart disease                                                | 0.87 (0.78-0.96)   | <0.05 |  | 0.92 (0.79-1.08) | 0.305 |  | 0.94 (0.78-1.13) | 0.488 |  | 0.78 (0.55-1.09)   | 0.153 |  | 0.29 (0.07-1.26) | 0.097 |  |
| neoplasm                                                              | 0.98 (0.94-1.03)   | 0.361 |  | 1.01 (0.95-1.07) | 0.874 |  | 0.87 (0.8-0.94)  | <0.05 |  | 0.7 (0.56-0.89)    | <0.05 |  | 0.55 (0.32-0.97) | <0.05 |  |
| nicotine dependence                                                   | 1.28 (1.16-1.42)   | <0.05 |  | 1.21 (1.05-1.4)  | <0.05 |  | 1.36 (1.14-1.63) | <0.05 |  | 0.73 (0.38-1.37)   | 0.319 |  | 1.58 (0.57-4.38) | 0.378 |  |
| non hypertensive chronic kidney disease                               | 1.12 (1.01-1.23)   | <0.05 |  | 1.03 (0.88-1.2)  | 0.677 |  | 1.42 (1.2-1.68)  | <0.05 |  | 1.34 (0.97-1.85)   | 0.078 |  | 0.67 (0.21-2.12) | 0.497 |  |
| non ischemic heart disease                                            | 1 (0.94-1.06)      | 0.978 |  | 0.94 (0.87-1.02) | 0.156 |  | 1 (0.9-1.11)     | 0.955 |  | 1.43 (1.11-1.85)   | <0.05 |  | 0.82 (0.45-1.5)  | 0.509 |  |
| other liver disease                                                   | 0.97 (0.87-1.08)   | 0.518 |  | 0.84 (0.72-0.99) | <0.05 |  | 0.97 (0.8-1.17)  | 0.787 |  | 0.63 (0.33-1.17)   | 0.138 |  | 3.94 (1.88-8.25) | <0.05 |  |

**Table S16. Logistic Regression for All Factors and Outcomes for 14-120 Day Early Post-Acute Phase Definition.** We performed a sensitivity analysis of the main finding by varying the definition for the early post-acute phase by beginning it at 14 days after diagnosis. Odds ratios, 95% confidence intervals, and p-values for the association of features in all factors and outcomes.

| Predictor                                | All Mental Illness |       | Anxiety Disorder |       | Mood Disorder    |       | Dementia            |       | Psychosis        |       |
|------------------------------------------|--------------------|-------|------------------|-------|------------------|-------|---------------------|-------|------------------|-------|
|                                          | OR (CI)            | p-val | OR (CI)          | p-val | OR (CI)          | p-val | OR (CI)             | p-val | OR (CI)          | p-val |
| constitutional                           | 1.55 (1.51-1.6)    | <0.05 | 1.65 (1.58-1.71) | <0.05 | 1.47 (1.4-1.55)  | <0.05 | 1.32 (1.17-1.49)    | <0.05 | 1.19 (0.91-1.56) | 0.21  |
| neurological                             | 2.19 (2.14-2.25)   | <0.05 | 2.05 (1.98-2.12) | <0.05 | 2.11 (2.03-2.2)  | <0.05 | 2.58 (2.39-2.79)    | <0.05 | 3.26 (2.84-3.75) | <0.05 |
| gastrointestinal                         | 1.39 (1.35-1.43)   | <0.05 | 1.39 (1.33-1.45) | <0.05 | 1.37 (1.3-1.44)  | <0.05 | 1.16 (1-1.34)       | <0.05 | 0.99 (0.71-1.36) | 0.93  |
| pulmonary                                | 1.07 (1.03-1.12)   | <0.05 | 1.06 (1-1.12)    | <0.05 | 1.05 (0.98-1.13) | 0.14  | 0.82 (0.69-0.97)    | <0.05 | 0.7 (0.46-1.06)  | 0.094 |
| cardiovascular                           | 1.67 (1.6-1.74)    | <0.05 | 1.9 (1.8-2.01)   | <0.05 | 1.27 (1.17-1.38) | <0.05 | 1.38 (1.16-1.64)    | <0.05 | 1.26 (0.82-1.95) | 0.29  |
| ENT                                      | 1.23 (1.16-1.3)    | <0.05 | 1.32 (1.22-1.42) | <0.05 | 1.1 (0.99-1.22)  | 0.072 | 1.03 (0.8-1.33)     | 0.83  | 0.71 (0.39-1.31) | 0.28  |
| endocrine                                | 1.04 (0.97-1.11)   | 0.25  | 0.97 (0.88-1.06) | 0.5   | 1.26 (1.14-1.41) | <0.05 | 0.76 (0.57-1.01)    | 0.057 | 1.15 (0.67-1.98) | 0.61  |
| laboratory                               | 1.48 (1.39-1.58)   | <0.05 | 1.34 (1.22-1.48) | <0.05 | 1.33 (1.19-1.5)  | <0.05 | 1.52 (1.21-1.9)     | <0.05 | 0.67 (0.33-1.38) | 0.28  |
| age under 10                             | 1.08 (1-1.17)      | <0.05 | 0.48 (0.42-0.55) | <0.05 | 0.33 (0.27-0.4)  | <0.05 | 20.17 (14.22-28.62) | <0.05 | 0.88 (0.38-2.02) | 0.76  |
| age 10 to 19                             | 1.54 (1.45-1.62)   | <0.05 | 1.35 (1.25-1.46) | <0.05 | 1.6 (1.46-1.77)  | <0.05 | 1.62 (1.05-2.5)     | <0.05 | 0.44 (0.21-0.91) | <0.05 |
| age 20 to 29                             | 1.51 (1.45-1.58)   | <0.05 | 1.6 (1.5-1.69)   | <0.05 | 1.59 (1.48-1.72) | <0.05 | 0.88 (0.56-1.36)    | 0.55  | 1.35 (0.88-2.08) | 0.17  |
| age 30 to 39                             | 1.39 (1.33-1.45)   | <0.05 | 1.49 (1.41-1.58) | <0.05 | 1.34 (1.24-1.44) | <0.05 | 0.49 (0.3-0.82)     | <0.05 | 1.08 (0.7-1.67)  | 0.74  |
| age 40 to 49                             | 1.15 (1.1-1.21)    | <0.05 | 1.23 (1.16-1.3)  | <0.05 | 1.1 (1.01-1.19)  | <0.05 | 0.7 (0.45-1.09)     | 0.11  | 0.69 (0.42-1.12) | 0.13  |
| age 50 to 59                             | 1                  | REF   | 1                | REF   | 1                | REF   | 1                   | REF   | 1                | REF   |
| age 60 to 69                             | 0.89 (0.85-0.94)   | <0.05 | 0.79 (0.74-0.85) | <0.05 | 0.96 (0.89-1.04) | 0.32  | 2.2 (1.58-3.07)     | <0.05 | 1.44 (0.95-2.19) | 0.085 |
| age 70 to 79                             | 0.88 (0.83-0.93)   | <0.05 | 0.69 (0.63-0.75) | <0.05 | 0.96 (0.87-1.06) | 0.4   | 7.63 (5.63-10.35)   | <0.05 | 1.34 (0.81-2.22) | 0.25  |
| age over 80                              | 0.98 (0.9-1.06)    | 0.57  | 0.6 (0.53-0.68)  | <0.05 | 0.81 (0.7-0.94)  | <0.05 | 22.97 (16.91-31.22) | <0.05 | 2.23 (1.21-4.1)  | <0.05 |
| BMI under 20                             | 0.92 (0.86-0.99)   | <0.05 | 0.92 (0.83-1.02) | 0.11  | 0.72 (0.61-0.85) | <0.05 | 0.15 (0.08-0.29)    | <0.05 | 0.49 (0.19-1.23) | 0.13  |
| BMI 20 to 25                             | 1 (0.94-1.05)      | 0.93  | 0.99 (0.92-1.07) | 0.84  | 0.93 (0.84-1.03) | 0.18  | 1.05 (0.82-1.33)    | 0.71  | 0.86 (0.52-1.42) | 0.54  |
| BMI 25 to 30                             | 1                  | REF   | 1                | REF   | 1                | REF   | 1                   | REF   | 1                | REF   |
| BMI 30 to 35                             | 1.03 (0.99-1.08)   | 0.13  | 1.03 (0.98-1.09) | 0.27  | 1.04 (0.95-1.14) | 0.35  | 0.98 (0.78-1.22)    | 0.84  | 1.13 (0.74-1.73) | 0.56  |
| BMI 35 to 40                             | 1.04 (0.98-1.11)   | 0.2   | 1.03 (0.95-1.13) | 0.44  | 1.11 (0.99-1.23) | 0.068 | 0.86 (0.63-1.18)    | 0.34  | 0.97 (0.51-1.87) | 0.94  |
| BMI over 40                              | 1.08 (1.01-1.16)   | <0.05 | 1.05 (0.96-1.16) | 0.26  | 1.19 (1.08-1.32) | <0.05 | 0.82 (0.63-1.08)    | 0.16  | 0.97 (0.58-1.62) | 0.92  |
| gender MALE                              | 0.67 (0.65-0.68)   | <0.05 | 0.53 (0.51-0.55) | <0.05 | 0.47 (0.45-0.5)  | <0.05 | 0.76 (0.66-0.86)    | <0.05 | 0.91 (0.71-1.16) | 0.44  |
| gender FEMALE                            | 1                  | REF   | 1                | REF   | 1                | REF   | 1                   | REF   | 1                | REF   |
| smoking status                           | 1.23 (1.11-1.35)   | <0.05 | 1.1 (0.95-1.26)  | 0.2   | 1.24 (1.06-1.46) | <0.05 | 1.2 (0.66-2.16)     | 0.56  | 0.79 (0.34-1.85) | 0.59  |
| length of stay 0d                        | 1                  | REF   | 1                | REF   | 1                | REF   | 1                   | REF   | 1                | REF   |
| length of stay 1d                        | 1.41 (1.3-1.53)    | <0.05 | 1.37 (1.22-1.54) | <0.05 | 1.21 (1.03-1.41) | <0.05 | 1.72 (1.2-2.45)     | <0.05 | 1.69 (0.84-3.41) | 0.14  |
| length of stay 2d 3d                     | 1.29 (1.18-1.4)    | <0.05 | 1.09 (0.95-1.24) | 0.21  | 1.33 (1.15-1.54) | <0.05 | 1.38 (1.01-1.89)    | <0.05 | 2.48 (1.38-4.45) | <0.05 |
| length of stay 4d 7d                     | 1.31 (1.21-1.41)   | <0.05 | 1.19 (1.06-1.33) | <0.05 | 1.38 (1.22-1.56) | <0.05 | 1.73 (1.36-2.19)    | <0.05 | 1.94 (1.11-3.42) | <0.05 |
| length of stay in gt 7d                  | 2.02 (1.88-2.17)   | <0.05 | 1.91 (1.72-2.12) | <0.05 | 1.6 (1.4-1.83)   | <0.05 | 2.47 (1.98-3.09)    | <0.05 | 1.6 (0.82-3.1)   | 0.17  |
| race ethnicity White                     | 1                  | REF   | 1                | REF   | 1                | REF   | 1                   | REF   | 1                | REF   |
| Non Hispanic                             |                    |       |                  |       |                  |       |                     |       |                  |       |
| race ethnicity Other                     | 0.67 (0.59-0.75)   | <0.05 | 0.61 (0.52-0.72) | <0.05 | 0.6 (0.48-0.74)  | <0.05 | 0.79 (0.42-1.49)    | 0.47  | 0.6 (0.15-2.45)  | 0.48  |
| Non Hispanic                             |                    |       |                  |       |                  |       |                     |       |                  |       |
| race ethnicity Native                    | 0.86 (0.59-1.26)   | 0.44  | 0.7 (0.39-1.25)  | 0.23  | 0.81 (0.42-1.58) | 0.54  | null                | null  | null             | null  |
| Hawaiian or Other Pacific Islander       |                    |       |                  |       |                  |       |                     |       |                  |       |
| Non Hispanic                             |                    |       |                  |       |                  |       |                     |       |                  |       |
| race ethnicity Hispanic or Latino        | 1.04 (1.01-1.08)   | <0.05 | 0.98 (0.93-1.03) | 0.37  | 0.87 (0.81-0.93) | <0.05 | 0.87 (0.68-1.1)     | 0.23  | 1.34 (0.93-1.95) | 0.12  |
| Any Race                                 |                    |       |                  |       |                  |       |                     |       |                  |       |
| race ethnicity Unknown                   | 1.05 (0.98-1.13)   | 0.13  | 1.01 (0.92-1.11) | 0.87  | 0.86 (0.76-0.98) | <0.05 | 1.16 (0.8-1.7)      | 0.43  | 1.13 (0.54-2.37) | 0.75  |
| race ethnicity Black or African American | 0.89 (0.86-0.93)   | <0.05 | 0.69 (0.65-0.73) | <0.05 | 0.73 (0.69-0.78) | <0.05 | 1.04 (0.86-1.26)    | 0.66  | 1.98 (1.46-2.68) | <0.05 |
| Non Hispanic                             |                    |       |                  |       |                  |       |                     |       |                  |       |
| race ethnicity Asian                     | 0.75 (0.68-0.81)   | <0.05 | 0.68 (0.6-0.77)  | <0.05 | 0.61 (0.52-0.72) | <0.05 | 0.88 (0.56-1.38)    | 0.56  | 0.87 (0.35-2.13) | 0.75  |
| Non Hispanic                             |                    |       |                  |       |                  |       |                     |       |                  |       |
| chronic resp                             | 1.27 (1.22-1.31)   | <0.05 | 1.32 (1.25-1.39) | <0.05 | 1.22 (1.14-1.3)  | <0.05 | 0.82 (0.68-0.99)    | <0.05 | 1.19 (0.81-1.74) | 0.37  |
| diabetes2                                | 1.09 (1.04-1.14)   | <0.05 | 0.99 (0.93-1.05) | 0.73  | 1.25 (1.17-1.35) | <0.05 | 1.18 (1-1.4)        | 0.051 | 1 (0.67-1.5)     | 1     |
| hepatic steatosis                        | 0.93 (0.86-1.02)   | 0.13  | 0.93 (0.82-1.05) | 0.25  | 0.9 (0.77-1.04)  | 0.16  | 0.67 (0.38-1.19)    | 0.17  | 0.32 (0.1-1.06)  | 0.063 |
| hypertension                             | 1.23 (1.18-1.27)   | <0.05 | 1.23 (1.17-1.29) | <0.05 | 1.18 (1.11-1.26) | <0.05 | 1.38 (1.17-1.62)    | <0.05 | 0.86 (0.61-1.21) | 0.38  |
| hypertensive kidney disease              | 0.87 (0.79-0.97)   | <0.05 | 0.88 (0.75-1.04) | 0.14  | 0.81 (0.68-0.96) | <0.05 | 0.88 (0.67-1.17)    | 0.37  | 1.51 (0.6-3.81)  | 0.38  |
| ischemic heart disease                   | 0.88 (0.82-0.95)   | <0.05 | 0.91 (0.81-1.01) | 0.084 | 0.95 (0.84-1.08) | 0.44  | 0.85 (0.67-1.07)    | 0.16  | 0.79 (0.4-1.54)  | 0.48  |
| neoplasm                                 | 1.12 (1.08-1.16)   | <0.05 | 1.15 (1.09-1.2)  | <0.05 | 0.97 (0.92-1.04) | 0.4   | 0.62 (0.53-0.74)    | <0.05 | 0.55 (0.37-0.81) | <0.05 |
| nicotine dependence                      | 1.41 (1.31-1.51)   | <0.05 | 1.34 (1.21-1.48) | <0.05 | 1.44 (1.28-1.63) | <0.05 | 0.86 (0.54-1.35)    | 0.51  | 2.02 (1.12-3.63) | <0.05 |
| non hypertensive                         | 1.02 (0.95-1.1)    | 0.54  | 0.91 (0.81-1.02) | 0.11  | 1.2 (1.06-1.36)  | <0.05 | 1.32 (1.07-1.64)    | <0.05 | 0.7 (0.32-1.5)   | 0.36  |
| chronic kidney disease                   |                    |       |                  |       |                  |       |                     |       |                  |       |
| non ischemic heart disease               | 1.03 (0.99-1.08)   | 0.17  | 0.98 (0.92-1.04) | 0.53  | 1.05 (0.98-1.13) | 0.18  | 1.42 (1.21-1.68)    | <0.05 | 0.98 (0.65-1.46) | 0.9   |
| other liver disease                      | 0.99 (0.91-1.07)   | 0.72  | 0.89 (0.79-1.01) | 0.061 | 0.97 (0.84-1.12) | 0.7   | 0.56 (0.35-0.91)    | <0.05 | 3.33 (1.98-5.6)  | <0.05 |

**Table S17. Logistic Regression for All Factors and Outcomes for Early Post-Acute Phase Definition Beginning at 21 Days After Diagnosis or Discharge.** We performed a sensitivity analysis of the main finding by varying the definition for the early post-acute phase by beginning it at 21 days after diagnosis for outpatients and 21 days after discharge for inpatients. Odds ratios, 95% confidence intervals, and p-values for the association of features in all factors and outcomes.

| Predictor                                                | All Mental Illness |       | Anxiety Disorder |       | Mood Disorder    |       | Dementia            |       | Psychosis        |       |
|----------------------------------------------------------|--------------------|-------|------------------|-------|------------------|-------|---------------------|-------|------------------|-------|
|                                                          | OR (CI)            | p-val | OR (CI)          | p-val | OR (CI)          | p-val | OR (CI)             | p-val | OR (CI)          | p-val |
| constitutional                                           | 1.64 (1.59-1.69)   | <0.05 | 1.73 (1.66-1.8)  | <0.05 | 1.53 (1.45-1.61) | <0.05 | 1.35 (1.17-1.56)    | <0.05 | 1.16 (0.85-1.59) | 0.36  |
| neurological                                             | 2.33 (2.27-2.39)   | <0.05 | 2.2 (2.13-2.28)  | <0.05 | 2.23 (2.14-2.33) | <0.05 | 2.82 (2.59-3.08)    | <0.05 | 3.62 (3.11-4.21) | <0.05 |
| gastrointestinal                                         | 1.44 (1.4-1.49)    | <0.05 | 1.45 (1.39-1.51) | <0.05 | 1.4 (1.33-1.48)  | <0.05 | 1.12 (0.94-1.34)    | 0.21  | 0.93 (0.64-1.36) | 0.72  |
| pulmonary                                                | 1.14 (1.09-1.19)   | <0.05 | 1.09 (1.02-1.16) | <0.05 | 1.15 (1.06-1.24) | <0.05 | 0.74 (0.59-0.93)    | <0.05 | 0.63 (0.37-1.09) | 0.1   |
| cardiovascular                                           | 1.79 (1.71-1.88)   | <0.05 | 2.07 (1.95-2.19) | <0.05 | 1.35 (1.24-1.48) | <0.05 | 1.54 (1.26-1.88)    | <0.05 | 1.42 (0.86-2.32) | 0.17  |
| ENT                                                      | 1.25 (1.18-1.33)   | <0.05 | 1.34 (1.23-1.45) | <0.05 | 1.1 (0.99-1.23)  | 0.086 | 1.14 (0.86-1.5)     | 0.36  | 0.75 (0.38-1.48) | 0.41  |
| endocrine                                                | 1.11 (1.03-1.19)   | <0.05 | 1.04 (0.94-1.15) | 0.45  | 1.36 (1.21-1.52) | <0.05 | 0.93 (0.67-1.28)    | 0.64  | 1.3 (0.69-2.45)  | 0.42  |
| age under 10                                             | 1.1 (1.02-1.19)    | <0.05 | 0.51 (0.45-0.58) | <0.05 | 0.3 (0.25-0.37)  | <0.05 | 19.9 (13.73-28.84)  | <0.05 | 0.67 (0.24-1.86) | 0.44  |
| age 10 to 19                                             | 1.58 (1.5-1.67)    | <0.05 | 1.41 (1.3-1.52)  | <0.05 | 1.62 (1.47-1.79) | <0.05 | 1.81 (1.15-2.84)    | <0.05 | 0.43 (0.2-0.94)  | <0.05 |
| age 20 to 29                                             | 1.55 (1.48-1.63)   | <0.05 | 1.66 (1.56-1.76) | <0.05 | 1.62 (1.5-1.75)  | <0.05 | 0.96 (0.61-1.52)    | 0.88  | 1.32 (0.83-2.11) | 0.24  |
| age 30 to 39                                             | 1.4 (1.34-1.47)    | <0.05 | 1.52 (1.43-1.62) | <0.05 | 1.33 (1.23-1.44) | <0.05 | 0.5 (0.29-0.85)     | <0.05 | 1.17 (0.74-1.85) | 0.51  |
| age 40 to 49                                             | 1.15 (1.09-1.2)    | <0.05 | 1.23 (1.15-1.31) | <0.05 | 1.07 (0.98-1.16) | 0.12  | 0.79 (0.5-1.25)     | 0.32  | 0.61 (0.35-1.04) | 0.07  |
| age 50 to 59                                             | 1                  | REF   | 1                | REF   | 1                | REF   | 1                   | REF   | 1                | REF   |
| age 60 to 69                                             | 0.87 (0.83-0.92)   | <0.05 | 0.79 (0.73-0.84) | <0.05 | 0.93 (0.85-1.01) | 0.089 | 2.26 (1.59-3.22)    | <0.05 | 1.33 (0.83-2.11) | 0.23  |
| age 70 to 79                                             | 0.86 (0.81-0.91)   | <0.05 | 0.69 (0.63-0.75) | <0.05 | 0.92 (0.83-1.02) | 0.12  | 7.05 (5.07-9.78)    | <0.05 | 1.38 (0.79-2.39) | 0.26  |
| age over 80                                              | 0.93 (0.85-1.02)   | 0.11  | 0.6 (0.52-0.7)   | <0.05 | 0.75 (0.64-0.88) | <0.05 | 21.01 (15.09-29.25) | <0.05 | 2.36 (1.2-4.64)  | <0.05 |
| BMI under 20                                             | 0.93 (0.86-1.01)   | 0.091 | 0.92 (0.81-1.03) | 0.14  | 0.74 (0.64-0.85) | <0.05 | 0.15 (0.08-0.3)     | <0.05 | 0.55 (0.17-1.74) | 0.3   |
| BMI 20 to 25                                             | 1 (0.95-1.06)      | 0.97  | 0.99 (0.92-1.07) | 0.79  | 0.94 (0.86-1.03) | 0.21  | 1 (0.76-1.33)       | 0.98  | 0.87 (0.52-1.45) | 0.58  |
| BMI 25 to 30                                             | 1                  | REF   | 1                | REF   | 1                | REF   | 1                   | REF   | 1                | REF   |
| BMI 30 to 35                                             | 1.04 (0.99-1.09)   | 0.12  | 1.04 (0.96-1.11) | 0.33  | 1.06 (0.98-1.14) | 0.15  | 1.03 (0.8-1.31)     | 0.83  | 1.15 (0.69-1.91) | 0.6   |
| BMI 35 to 40                                             | 1.04 (0.98-1.11)   | 0.21  | 1.04 (0.94-1.14) | 0.45  | 1.13 (1.02-1.25) | <0.05 | 0.89 (0.63-1.26)    | 0.51  | 0.91 (0.47-1.74) | 0.77  |
| BMI over 40                                              | 1.09 (1.02-1.16)   | <0.05 | 1.06 (0.96-1.16) | 0.24  | 1.22 (1.11-1.34) | <0.05 | 0.9 (0.65-1.26)     | 0.54  | 1.09 (0.59-2.03) | 0.78  |
| gender MALE                                              | 0.66 (0.64-0.68)   | <0.05 | 0.52 (0.5-0.54)  | <0.05 | 0.47 (0.45-0.5)  | <0.05 | 0.72 (0.62-0.83)    | <0.05 | 0.95 (0.72-1.24) | 0.69  |
| gender FEMALE                                            | 1                  | REF   | 1                | REF   | 1                | REF   | 1                   | REF   | 1                | REF   |
| smoking status                                           | 1.26 (1.14-1.39)   | <0.05 | 1.13 (0.97-1.3)  | 0.11  | 1.22 (1.03-1.45) | <0.05 | 1.26 (0.65-2.47)    | 0.5   | 0.9 (0.36-2.26)  | 0.83  |
| length of stay 0d                                        | 1                  | REF   | 1                | REF   | 1                | REF   | 1                   | REF   | 1                | REF   |
| length of stay 1d                                        | 1.28 (1.17-1.4)    | <0.05 | 1.22 (1.08-1.39) | <0.05 | 1.04 (0.88-1.23) | 0.65  | 1.44 (0.95-2.16)    | 0.083 | 1.27 (0.56-2.87) | 0.56  |
| length of stay 2d 3d                                     | 1.13 (1.03-1.24)   | <0.05 | 0.96 (0.83-1.11) | 0.58  | 1.14 (0.97-1.34) | 0.11  | 1.17 (0.82-1.68)    | 0.38  | 1.78 (0.89-3.58) | 0.1   |
| length of stay 4d 7d                                     | 1.06 (0.97-1.16)   | 0.18  | 0.91 (0.79-1.04) | 0.15  | 1.04 (0.9-1.21)  | 0.59  | 1.56 (1.19-2.03)    | <0.05 | 1.1 (0.52-2.34)  | 0.8   |
| length of stay in gt 7d                                  | 1.11 (1-1.23)      | <0.05 | 1.04 (0.89-1.21) | 0.65  | 0.89 (0.74-1.08) | 0.25  | 1.75 (1.32-2.34)    | <0.05 | 0.19 (0.03-1.38) | 0.1   |
| race ethnicity White                                     | 1                  | REF   | 1                | REF   | 1                | REF   | 1                   | REF   | 1                | REF   |
| Non Hispanic                                             |                    |       |                  |       |                  |       |                     |       |                  |       |
| race ethnicity Other                                     | 0.66 (0.58-0.75)   | <0.05 | 0.58 (0.49-0.7)  | <0.05 | 0.6 (0.48-0.75)  | <0.05 | 0.81 (0.42-1.58)    | 0.54  | 0.72 (0.18-2.93) | 0.65  |
| Non Hispanic                                             |                    |       |                  |       |                  |       |                     |       |                  |       |
| race ethnicity Native Hawaiian or Other Pacific Islander | 0.87 (0.58-1.31)   | 0.51  | 0.79 (0.45-1.41) | 0.43  | 0.81 (0.4-1.63)  | 0.55  | null                | null  | null             | null  |
| Non Hispanic                                             |                    |       |                  |       |                  |       |                     |       |                  |       |
| race ethnicity Hispanic or Latino                        | 1.04 (1-1.08)      | <0.05 | 0.97 (0.92-1.02) | 0.2   | 0.89 (0.83-0.95) | <0.05 | 0.86 (0.66-1.11)    | 0.24  | 1.41 (0.94-2.12) | 0.099 |
| Any Race                                                 |                    |       |                  |       |                  |       |                     |       |                  |       |
| race ethnicity Unknown                                   | 1.07 (1-1.15)      | 0.059 | 1.03 (0.93-1.13) | 0.56  | 0.85 (0.74-0.98) | <0.05 | 1.29 (0.87-1.91)    | 0.2   | 1.2 (0.54-2.69)  | 0.65  |
| race ethnicity Black or African American                 | 0.89 (0.86-0.93)   | <0.05 | 0.69 (0.65-0.73) | <0.05 | 0.75 (0.7-0.8)   | <0.05 | 1 (0.81-1.24)       | 0.98  | 2.27 (1.64-3.15) | <0.05 |
| Non Hispanic                                             |                    |       |                  |       |                  |       |                     |       |                  |       |
| race ethnicity Asian                                     | 0.75 (0.68-0.82)   | <0.05 | 0.7 (0.61-0.79)  | <0.05 | 0.62 (0.52-0.73) | <0.05 | 1.04 (0.65-1.65)    | 0.88  | 0.84 (0.3-2.32)  | 0.74  |
| Non Hispanic                                             |                    |       |                  |       |                  |       |                     |       |                  |       |
| chronic resp                                             | 1.28 (1.23-1.33)   | <0.05 | 1.34 (1.27-1.42) | <0.05 | 1.19 (1.11-1.28) | <0.05 | 0.89 (0.73-1.09)    | 0.25  | 1.27 (0.84-1.93) | 0.26  |
| diabetes2                                                | 1.09 (1.04-1.14)   | <0.05 | 0.99 (0.93-1.06) | 0.81  | 1.26 (1.16-1.36) | <0.05 | 1.13 (0.94-1.36)    | 0.19  | 1.19 (0.76-1.84) | 0.45  |
| hepatic steatosis                                        | 0.92 (0.84-1.01)   | 0.084 | 0.92 (0.81-1.05) | 0.23  | 0.91 (0.78-1.07) | 0.24  | 0.53 (0.27-1.06)    | 0.072 | 0.24 (0.06-1.04) | 0.056 |
| hypertension                                             | 1.24 (1.19-1.29)   | <0.05 | 1.23 (1.16-1.29) | <0.05 | 1.2 (1.12-1.28)  | <0.05 | 1.44 (1.2-1.73)     | <0.05 | 0.77 (0.53-1.14) | 0.19  |
| hypertensive kidney disease                              | 0.87 (0.78-0.98)   | <0.05 | 0.95 (0.79-1.14) | 0.57  | 0.81 (0.67-0.98) | <0.05 | 0.84 (0.62-1.15)    | 0.29  | 1.05 (0.38-2.91) | 0.93  |
| ischemic heart disease                                   | 0.9 (0.83-0.97)    | <0.05 | 0.91 (0.8-1.02)  | 0.11  | 1.02 (0.89-1.17) | 0.75  | 0.9 (0.7-1.15)      | 0.39  | 0.52 (0.21-1.26) | 0.15  |
| neoplasm                                                 | 1.13 (1.09-1.17)   | <0.05 | 1.16 (1.1-1.21)  | <0.05 | 0.98 (0.92-1.04) | 0.47  | 0.61 (0.51-0.74)    | <0.05 | 0.51 (0.33-0.8)  | <0.05 |
| nicotine dependence                                      | 1.42 (1.32-1.53)   | <0.05 | 1.39 (1.25-1.54) | <0.05 | 1.48 (1.3-1.68)  | <0.05 | 0.76 (0.45-1.27)    | 0.29  | 1.97 (1.03-3.77) | <0.05 |
| non hypertensive                                         | 1.06 (0.98-1.15)   | 0.17  | 0.91 (0.8-1.04)  | 0.15  | 1.25 (1.09-1.43) | <0.05 | 1.38 (1.09-1.75)    | <0.05 | 0.99 (0.45-2.16) | 0.97  |
| chronic kidney disease                                   |                    |       |                  |       |                  |       |                     |       |                  |       |
| non ischemic heart disease                               | 1.03 (0.98-1.08)   | 0.2   | 0.96 (0.9-1.02)  | 0.22  | 1.01 (0.94-1.1)  | 0.72  | 1.48 (1.24-1.77)    | <0.05 | 0.94 (0.6-1.48)  | 0.8   |
| other liver disease                                      | 0.96 (0.88-1.05)   | 0.41  | 0.86 (0.75-0.98) | <0.05 | 0.99 (0.85-1.15) | 0.88  | 0.57 (0.33-0.98)    | <0.05 | 3.69 (2.09-6.5)  | <0.05 |

**Table S18. Chi-Square Analysis of Differential Rates of HPO Terms Between Outcomes:** In this analysis we perform a chi-square test to determine whether individual HPO terms are present at different rates in the groups of patients with each outcome. Count gives the total number of patients with the given term. P-val provides the Bonferroni corrected p-values for whether the difference between outcome groups is significant. Category provides the PASC-AM category that the HPO term was included in for the main analysis.

| HPO Term                             | count | p-val (adj)            | category         |
|--------------------------------------|-------|------------------------|------------------|
| Confusion (HP:0001289)               | 840   | $< 10^{-300}$          | neurological     |
| Chest pain (HP:0100749)              | 20298 | $< 10^{-300}$          | constitutional   |
| Fatigue (HP:0012378)                 | 16539 | $< 10^{-300}$          | constitutional   |
| Constipation (HP:0002019)            | 8069  | $< 10^{-300}$          | gastrointestinal |
| Memory impairment (HP:0002354)       | 1504  | $< 10^{-300}$          | neurological     |
| Migraine (HP:0002076)                | 3373  | $< 10^{-300}$          | neurological     |
| Encephalopathy (HP:0001298)          | 1421  | $< 10^{-300}$          | neurological     |
| Asthenia (HP:0025406)                | 4880  | $< 10^{-300}$          | constitutional   |
| Palpitations (HP:0001962)            | 7690  | $< 10^{-300}$          | cardiovascular   |
| Tachycardia (HP:0001649)             | 5969  | $< 10^{-300}$          | cardiovascular   |
| Hypotension (HP:0002615)             | 2027  | $< 10^{-300}$          | cardiovascular   |
| Insomnia (HP:0100785)                | 4330  | $< 10^{-300}$          | neurological     |
| Vertigo (HP:0002321)                 | 8284  | $< 10^{-300}$          | ENT              |
| Headache (HP:0002315)                | 9716  | $< 10^{-300}$          | neurological     |
| Seizure (HP:0001250)                 | 2938  | $1.4 \times 10^{-292}$ | neurological     |
| Auditory hallucinations (HP:0008765) | 36    | $1.6 \times 10^{-283}$ | neurological     |
| Dysphagia (HP:0002015)               | 4003  | $7.3 \times 10^{-273}$ | neurological     |
| Nausea (HP:0002018)                  | 4996  | $1.4 \times 10^{-248}$ | gastrointestinal |
| Visual hallucinations (HP:0002367)   | 63    | $1.7 \times 10^{-203}$ | neurological     |
| Hallucinations (HP:0000738)          | 120   | $6.4 \times 10^{-188}$ | neurological     |
| Aphasia (HP:0002381)                 | 294   | $4.0 \times 10^{-185}$ | neurological     |
| Diarrhea (HP:0002014)                | 7027  | $1.4 \times 10^{-145}$ | gastrointestinal |
| Abdominal pain (HP:0002027)          | 11484 | $5.3 \times 10^{-135}$ | gastrointestinal |
| Thrombocytopenia (HP:0001873)        | 3204  | $4.3 \times 10^{-134}$ | laboratory       |
| Hypoxemia (HP:0012418)               | 4627  | $3.2 \times 10^{-130}$ | pulmonary        |
| Restless legs (HP:0012452)           | 1397  | $6.5 \times 10^{-119}$ | neurological     |
| Atelectasis (HP:0100750)             | 1844  | $1.7 \times 10^{-113}$ | pulmonary        |
| Paresthesia (HP:0003401)             | 3313  | $5.2 \times 10^{-111}$ | neurological     |
| Polyneuropathy (HP:0001271)          | 2988  | $6.2 \times 10^{-104}$ | neurological     |
| Sleep apnea (HP:0010535)             | 3428  | $6.2 \times 10^{-97}$  | neurological     |
| Tremor (HP:0001337)                  | 1076  | $1.6 \times 10^{-94}$  | neurological     |
| Irregular menstruation (HP:0000858)  | 2594  | $1.4 \times 10^{-92}$  | endocrine        |
| Arthralgia (HP:0002829)              | 2661  | $5.7 \times 10^{-86}$  | constitutional   |
| Hyperglycemia (HP:0003074)           | 5112  | $1.5 \times 10^{-85}$  | laboratory       |
| Gastroesophageal reflux (HP:0002020) | 3049  | $1.3 \times 10^{-77}$  | gastrointestinal |
| Hypoglycemia (HP:0001943)            | 796   | $5.6 \times 10^{-77}$  | laboratory       |
| Hearing impairment (HP:0000365)      | 1478  | $6.5 \times 10^{-74}$  | ENT              |
| Pulmonary embolism (HP:0002204)      | 3690  | $2.6 \times 10^{-72}$  | pulmonary        |
| Bradycardia (HP:0001662)             | 2913  | $9.1 \times 10^{-72}$  | cardiovascular   |
| Shivering (HP:0025144)               | 721   | $8.0 \times 10^{-71}$  | constitutional   |
| Urinary incontinence (HP:0000020)    | 1254  | $2.3 \times 10^{-70}$  | endocrine        |

Continued on next page

**Table S18 – continued from previous page**

| <b>HPO Term</b>                      | <b>count</b> | <b>p-val (adj)</b>    | <b>category</b>  |
|--------------------------------------|--------------|-----------------------|------------------|
| Cough (HP:0012735)                   | 18073        | $2.9 \times 10^{-67}$ | pulmonary        |
| Hepatic steatosis (HP:0001397)       | 3732         | $4.3 \times 10^{-64}$ | gastrointestinal |
| Hyperkinetic movements (HP:0002487)  | 2556         | $4.9 \times 10^{-63}$ | neurological     |
| Hypocalcemia (HP:0002901)            | 825          | $5.2 \times 10^{-62}$ | laboratory       |
| Myalgia (HP:0003326)                 | 3756         | $7.5 \times 10^{-62}$ | constitutional   |
| Pain (HP:0012531)                    | 3474         | $1.0 \times 10^{-55}$ | constitutional   |
| Edema (HP:0000969)                   | 2933         | $5.5 \times 10^{-48}$ | endocrine        |
| Slurred speech (HP:0001350)          | 133          | $8.8 \times 10^{-47}$ | neurological     |
| Muscle weakness (HP:0001324)         | 1775         | $2.9 \times 10^{-45}$ | neurological     |
| Skin rash (HP:0000988)               | 5125         | $7.1 \times 10^{-43}$ | skin             |
| Pulmonary fibrosis (HP:0002206)      | 945          | $8.1 \times 10^{-41}$ | pulmonary        |
| Gastroparesis (HP:0002578)           | 452          | $3.4 \times 10^{-40}$ | gastrointestinal |
| Aggressive behavior (HP:0000718)     | < 20         | $5.0 \times 10^{-40}$ | neurological     |
| Dysarthria (HP:0001260)              | 216          | $1.2 \times 10^{-39}$ | neurological     |
| Vomiting (HP:0002013)                | 2439         | $3.0 \times 10^{-36}$ | gastrointestinal |
| Fever (HP:0001945)                   | 8322         | $1.0 \times 10^{-35}$ | endocrine        |
| Orthostatic hypotension (HP:0001278) | 800          | $1.1 \times 10^{-35}$ | neurological     |
| Dyspnea (HP:0002094)                 | 2362         | $6.5 \times 10^{-29}$ | pulmonary        |
| Tinnitus (HP:0000360)                | 954          | $2.0 \times 10^{-26}$ | ENT              |
| Hepatitis (HP:0012115)               | 165          | $8.1 \times 10^{-22}$ | gastrointestinal |
| Hypothermia (HP:0002045)             | 53           | $3.2 \times 10^{-20}$ | endocrine        |
| Pharyngalgia (HP:0033050)            | 803          | $9.1 \times 10^{-20}$ | ENT              |
| Hemoptysis (HP:0002105)              | 507          | $2.5 \times 10^{-19}$ | pulmonary        |
| Difficulty walking (HP:0002355)      | 799          | $9.4 \times 10^{-18}$ | constitutional   |
| Bowel incontinence (HP:0002607)      | 392          | $5.8 \times 10^{-17}$ | gastrointestinal |
| Bronchiectasis (HP:0002110)          | 720          | $9.4 \times 10^{-15}$ | pulmonary        |
| Diplopia (HP:0000651)                | 361          | $5.3 \times 10^{-14}$ | eye              |
| Ataxia (HP:0001251)                  | 208          | $3.5 \times 10^{-13}$ | neurological     |
| Night sweats (HP:0030166)            | < 20         | $1.3 \times 10^{-12}$ | constitutional   |
| Dystonia (HP:0001332)                | 110          | $2.4 \times 10^{-12}$ | neurological     |
| Irritability (HP:0000737)            | < 20         | $5.2 \times 10^{-12}$ | neurological     |
| Anaphylactic shock (HP:0100845)      | 176          | $1.3 \times 10^{-10}$ | immunology       |
| Wheezing (HP:0030828)                | 2038         | $1.3 \times 10^{-10}$ | pulmonary        |
| Nasal congestion (HP:0001742)        | 4380         | $3.6 \times 10^{-09}$ | ENT              |
| Pleuritis (HP:0002102)               | 534          | $3.8 \times 10^{-09}$ | pulmonary        |
| Myocarditis (HP:0012819)             | 170          | $3.7 \times 10^{-08}$ | cardiovascular   |
| Parageusia (HP:0031249)              | 454          | $9.3 \times 10^{-08}$ | neurological     |
| Splenomegaly (HP:0001744)            | 540          | $1.7 \times 10^{-07}$ | gastrointestinal |
| Arthritis (HP:0001369)               | 147          | $1.9 \times 10^{-07}$ | constitutional   |
| Syncope (HP:0001279)                 | 438          | $1.0 \times 10^{-06}$ | cardiovascular   |
| Malnutrition (HP:0004395)            | 302          | $1.0 \times 10^{-06}$ | gastrointestinal |
| Ear pain (HP:0030766)                | 2002         | $1.0 \times 10^{-06}$ | ENT              |
| Renal insufficiency (HP:0000083)     | 274          | $1.0 \times 10^{-06}$ | endocrine        |
| Pancreatitis (HP:0001733)            | < 20         | $2.3 \times 10^{-06}$ | endocrine        |
| Lymphopenia (HP:0001888)             | 216          | $1.4 \times 10^{-05}$ | immunology       |
| Anosmia (HP:0000458)                 | 602          | $1.8 \times 10^{-05}$ | neurological     |
| Limb pain (HP:0009763)               | 1713         | $4.5 \times 10^{-05}$ | constitutional   |

Continued on next page

**Table S18 – continued from previous page**

| <b>HPO Term</b>                                                    | <b>count</b> | <b>p-val (adj)</b> | <b>category</b>  |
|--------------------------------------------------------------------|--------------|--------------------|------------------|
| Chest tightness (HP:0031352)                                       | 41           | 0.00018341         | constitutional   |
| Keratoconjunctivitis sicca (HP:0001097)                            | 3276         | 0.000216047        | eye              |
| Angina pectoris (HP:0001681)                                       | 1333         | 0.000419074        | cardiovascular   |
| Elevated circulating C reactive protein concentration (HP:0011227) | 59           | 0.0012767          | laboratory       |
| Sleep disturbance (HP:0002360)                                     | 163          | 0.00178605         | neurological     |
| Elevated erythrocyte sedimentation rate (HP:0003565)               | 300          | 0.00477857         | laboratory       |
| Hepatomegaly (HP:0002240)                                          | 567          | 0.00740509         | gastrointestinal |
| Ocular pain (HP:0200026)                                           | 576          | 0.0513893          | eye              |
| Menorrhagia (HP:0000132)                                           | 276          | 0.0714236          | endocrine        |
| Hypertension (HP:0000822)                                          | 426          | 0.100324           | cardiovascular   |
| Pruritus (HP:0000989)                                              | 248          | 0.128858           | skin             |
| Lymphadenopathy (HP:0002716)                                       | 780          | 0.607963           | immunology       |
| Skeletal muscle atrophy (HP:0003202)                               | 225          | 0.864746           | neurological     |
| Hyperesthesia (HP:0100963)                                         | 24           | 1.0                | neurological     |
| Recurrent fever (HP:0001954)                                       | 45           | 1.0                | endocrine        |
| Venous thrombosis (HP:0004936)                                     | 70           | 1.0                | cardiovascular   |
| Exercise intolerance (HP:0003546)                                  | < 20         | 1.0                | constitutional   |
| Photophobia (HP:0000613)                                           | < 20         | 1.0                | eye              |
| Hyposmia (HP:0004409)                                              | < 20         | 1.0                | neurological     |
| Red eye (HP:0025337)                                               | < 20         | 1.0                | eye              |
| Babinski sign (HP:0003487)                                         | < 20         | 1.0                | neurological     |
| Parkinsonism (HP:0001300)                                          | < 20         | 1.0                | neurological     |
| Conjunctivitis (HP:0000509)                                        | 522          | 1.0                | eye              |
| Scaling skin (HP:0040189)                                          | < 20         | 1.0                | skin             |
| Abnormality of movement (HP:0100022)                               | 97           | 1.0                | neurological     |
| Alopecia (HP:0001596)                                              | 111          | 1.0                | skin             |
| Diminished ability to concentrate (HP:0031987)                     | < 20         | 1.0                | neurological     |
| Restrictive ventilatory defect (HP:0002091)                        | < 20         | 1.0                | pulmonary        |
| Pulsatile tinnitus (HP:0008629)                                    | 120          | 1.0                | ENT              |
| Bone pain (HP:0002653)                                             | < 20         | 1.0                | constitutional   |
| Hypophosphatemia (HP:0002148)                                      | < 20         | 1.0                | laboratory       |
| Xerostomia (HP:0000217)                                            | 227          | 1.0                | constitutional   |
| Petechiae (HP:0000967)                                             | < 20         | 1.0                | skin             |
| Male sexual dysfunction (HP:0040307)                               | < 20         | 1.0                | endocrine        |
| Vitreous floaters (HP:0100832)                                     | 592          | 1.0                | eye              |
| Hyperacusis (HP:0010780)                                           | 27           | 1.0                | ENT              |
| Muscle spasm (HP:0003394)                                          | 51           | 1.0                | neurological     |
| Abnormal reflex (HP:0031826)                                       | 86           | 1.0                | neurological     |
| Sneeze (HP:0025095)                                                | 101          | 1.0                | pulmonary        |
| Elevated circulating creatinine concentration (HP:0003259)         | 38           | 1.0                | laboratory       |
| Blurred vision (HP:0000622)                                        | 38           | 1.0                | eye              |
| Dermatographic urticaria (HP:0011971)                              | 87           | 1.0                | skin             |
| Nonproductive cough (HP:0031246)                                   | < 20         | 1.0                | pulmonary        |
| Impaired executive functioning (HP:0033051)                        | < 20         | 1.0                | neurological     |

Continued on next page

**Table S18 – continued from previous page**

| <b>HPO Term</b>                                                             | <b>count</b> | <b>p-val (adj)</b> | <b>category</b>  |
|-----------------------------------------------------------------------------|--------------|--------------------|------------------|
| Hyperhidrosis (HP:0000975)                                                  | < 20         | 1.0                | skin             |
| Elevated circulating alkaline phosphatase concentration (HP:0003155)        | < 20         | 1.0                | laboratory       |
| Productive cough (HP:0031245)                                               | < 20         | 1.0                | pulmonary        |
| Exertional dyspnea (HP:0002875)                                             | 291          | 1.0                | pulmonary        |
| Bradykinesia (HP:0002067)                                                   | < 20         | 1.0                | neurological     |
| Pleural thickening (HP:0031944)                                             | < 20         | 1.0                | pulmonary        |
| Pericardial effusion (HP:0001698)                                           | < 20         | 1.0                | cardiovascular   |
| Rhinitis (HP:0012384)                                                       | 29           | 1.0                | ENT              |
| Ageusia (HP:0041051)                                                        | < 20         | 1.0                | neurological     |
| Spasticity (HP:0001257)                                                     | < 20         | 1.0                | neurological     |
| Diabetes mellitus (HP:0000819)                                              | 321          | 1.0                | endocrine        |
| Antinuclear antibody positivity (HP:0003493)                                | 47           | 1.0                | immunology       |
| Agnosia (HP:0010524)                                                        | 42           | 1.0                | neurological     |
| Somatic sensory dysfunction (HP:0003474)                                    | < 20         | 1.0                | neurological     |
| Hypofibrinogenemia (HP:0011900)                                             | < 20         | 1.0                | laboratory       |
| Rhinorrhea (HP:0031417)                                                     | 60           | 1.0                | pulmonary        |
| Stroke (HP:0001297)                                                         | 62           | 1.0                | cardiovascular   |
| Low grade fever (HP:0011134)                                                | < 20         | 1.0                | endocrine        |
| Hand muscle weakness (HP:0030237)                                           | < 20         | 1.0                | neurological     |
| Gastric ulcer (HP:0002592)                                                  | < 20         | 1.0                | gastrointestinal |
| Elevated circulating thyroid stimulating hormone concentration (HP:0002925) | 25           | 1.0                | laboratory       |
| Blindness (HP:0000618)                                                      | < 20         | 1.0                | eye              |
